# Supplementary material for: Micronutrient Status in Adult Crohn’s Disease during Clinical Remission: A Systematic Review
Source: MDPI journal article supplement (doi:10.3390/nu15224777), 2023-11-14
Supplement: s1 [file s1]

## Supplementary Materials

### Supplementary S1: Search Technique

#### **COCHRANE**

| ID | Search Hits                                         |      |
|----|-----------------------------------------------------|------|
| #1 | MeSH descriptor: [Crohn Disease] explode all trees  | 1641 |
| #2 | MeSH descriptor: [Vitamins] this term only          | 4153 |
| #3 | MeSH descriptor: [Micronutrients] explode all trees | 5901 |
| #4 | #2 OR #3                                            | 5902 |
| #5 | #1 AND #4                                           | 28   |

#### **OVID MEDLINE**

Ovid MEDLINE(R) and Epub Ahead of Print, In-Process, In-Data-Review & Other Non-Indexed Citations, Daily and Versions(R) <1946 to June 14, 2021>

- 1 (Crohn\* or (Crohn Disease or Crohn abscess or "Crohn's disease of small intestine" or Crohn Disease like Reaction or "Crohn's disease of large bowel" or Crohns disease aggravated or Crohns associated arthritis or Arthropathy in Crohn's disease or Juvenile arthritis in Crohn disease or abscess Crohn large intestine or arthritis Crohn manifestation or small intestine abscess regional enteritis or Crohn with large intestine with small intestine or abscess Crohn small intestine with large intestine)).mp. [mp=title, abstract, original title, name of substance word, subject heading word, floating sub-heading word, keyword heading word, organism supplementary concept word, protocol supplementary concept word, rare disease supplementary concept word, unique identifier, synonyms]  
59406
- 2 limit 1 to (english language and humans) 43134
- 3 (inflammatory bowel disease or (Inflammatory Bowel Diseases or Inflammatory Bowel Disease Agents TC or noninfective inflammatory bowel disease)).mp. [mp=title, abstract, original title, name of substance word, subject heading word, floating sub-heading word, keyword heading word, organism supplementary concept word, protocol supplementary concept word, rare disease supplementary concept word, unique identifier, synonyms] 58001
- 4 limit 3 to (english language and humans) 39919
- 5 2 or 4 65980
- 6 (vitamin\* or (vitamin A or Vitamins or Vitamin A EPC or Vitamin A measurement or vitamin excess vitamin A nutritional or vitamin excess vitamin K or vitamin A vitamin E or lecithin vitamin A vitamin E or vitamin A vitamin E Pill or ascorbic acid or ergocalciferol or niacinamide or tretinoin or vitamin E or retinol acetate or Administering Vitamin or D Vitamin or Retinol Activity Equivalent or folic acid or vitamin B complex or vitamin D or vitamin K or Vitamin A Deficiency or vitamin A Oral Capsule)).mp. [mp=title, abstract, original title, name of substance word, subject heading word, floating sub-heading word, keyword heading word, organism supplementary concept word, protocol supplementary concept word, rare disease supplementary concept word, unique identifier, synonyms]  
374460

7 (micronutrient or (Micronutrients or "Deficiency of micronutrients")).mp. [mp=title, abstract, original title, name of substance word, subject heading word, floating sub-heading word, keyword heading word, organism supplementary concept word, protocol supplementary concept word, rare disease supplementary concept word, unique identifier, synonyms] 19265

8 6 or 7 385335

9 5 and 8 1476

## **OVID EMBASE**

Embase <1974 to 2021 June 14>

1 (Crohn\* or (Crohn Disease or Crohn abscess or "Crohn's disease of small intestine" or Crohn Disease like Reaction or "Crohn's disease of large bowel" or Crohns disease aggravated or Crohns associated arthritis or Arthropathy in Crohn's disease or Juvenile arthritis in Crohn disease or abscess Crohn large intestine or arthritis Crohn manifestation or small intestine abscess regional enteritis or Crohn with large intestine with small intestine or abscess Crohn small intestine with large intestine)).mp. [mp=title, abstract, heading word, drug trade name, original title, device manufacturer, drug manufacturer, device trade name, keyword, floating subheading word, candidate term word] 109254

2 limit 1 to (english language and humans) 88084

3 (inflammatory bowel disease or (Inflammatory Bowel Diseases or Inflammatory Bowel Disease Agents TC or noninfective inflammatory bowel disease)).mp. [mp=title, abstract, heading word, drug trade name, original title, device manufacturer, drug manufacturer, device trade name, keyword, floating subheading word, candidate term word] 98941

4 limit 3 to (english language and humans) 77831

5 2 or 4 126990

6 (vitamin\* or (vitamin A or Vitamins or Vitamin A EPC or Vitamin A measurement or vitamin excess vitamin A nutritional or vitamin excess vitamin K or vitamin A vitamin E or lecithin vitamin A vitamin E or vitamin A vitamin E Pill or ascorbic acid or ergocalciferol or niacinamide or tretinoin or vitamin E or retinol acetate or Administering Vitamin or D Vitamin or Retinol Activity Equivalent or folic acid or vitamin B complex or vitamin D or vitamin K or Vitamin A Deficiency or vitamin A Oral Capsule)).mp. [mp=title, abstract, heading word, drug trade name, original title, device manufacturer, drug manufacturer, device trade name, keyword, floating subheading word, candidate term word] 466562

7 (micronutrient or (Micronutrients or "Deficiency of micronutrients")).mp. [mp=title, abstract, heading word, drug trade name, original title, device manufacturer, drug manufacturer, device trade name, keyword, floating subheading word, candidate term word] 23174

8 6 or 7 478359

9 5 and 8 4344

## **EBS CO CINAHL**

|           |                                                                                                                                                                                                                                                                                                                                                                                                                                                                                 |
|-----------|---------------------------------------------------------------------------------------------------------------------------------------------------------------------------------------------------------------------------------------------------------------------------------------------------------------------------------------------------------------------------------------------------------------------------------------------------------------------------------|
| <b>#5</b> | S1 AND S4                                                                                                                                                                                                                                                                                                                                                                                                                                                                       |
| <b>#4</b> | S2 OR S3                                                                                                                                                                                                                                                                                                                                                                                                                                                                        |
| <b>#3</b> | (MM "Vitamin B6 Deficiency") OR (MM "Vitamin B Deficiency+") OR "vitamin" OR (MM "Vitamin B12 Deficiency+") OR (MM "Vitamin D Deficiency+") OR (MM "Vitamin A Deficiency") OR (MM "Vitamin K Deficiency+") OR (MM "Vitamin E Deficiency") OR (MM "Riboflavin Deficiency") OR (MM "Pantothenic Acid") OR (MM "Vitamin B12 Injection (Saba CCC)") OR (MM "Thiamine Deficiency+") OR (MM "Ascorbic Acid Deficiency+") OR (MM "Vitamin K") OR (MM "Vitamin E") OR (MM "Vitamin D+") |
| <b>#2</b> | micronutrient*                                                                                                                                                                                                                                                                                                                                                                                                                                                                  |
| <b>#1</b> | (MM "Crohn Disease") OR (MM "Infliximab") OR (MM "Inflammatory Bowel Diseases+") OR "crohn*" OR (MM "Ileitis+")                                                                                                                                                                                                                                                                                                                                                                 |

## **WEB OF SCIENCE**

|           |                                                                                                                                                                                                                                                                                                                                                                                                                                                                                                                                                                                                                                                                                                                                                                                                                                                                                                                                                                                                                                                                                          |
|-----------|------------------------------------------------------------------------------------------------------------------------------------------------------------------------------------------------------------------------------------------------------------------------------------------------------------------------------------------------------------------------------------------------------------------------------------------------------------------------------------------------------------------------------------------------------------------------------------------------------------------------------------------------------------------------------------------------------------------------------------------------------------------------------------------------------------------------------------------------------------------------------------------------------------------------------------------------------------------------------------------------------------------------------------------------------------------------------------------|
| <b>#3</b> | #2 AND #1                                                                                                                                                                                                                                                                                                                                                                                                                                                                                                                                                                                                                                                                                                                                                                                                                                                                                                                                                                                                                                                                                |
| <b>#2</b> | TS=(micronutrient or Micronutrients or "Deficiency of micronutrients" or vitamin or (Vitamins or vitamin A or Vitamin A EPC or vitamins deprivation or Vitamin A measurement or VITAMIN A VITAMIN D or vitamin excess vitamin A nutritional or vitamin excess vitamin K or folic acid or vitamin A vitamin E or niacinamide or lecithin vitamin A vitamin E or pantothenic acid or vitamin A vitamin E Pill or riboflavin or ascorbic acid or thiamine or ergocalciferol or Vitamin A Deficiency or vitamin K or tretinoin or vitamin E or Vitamin disease or Multivitamin preparation or D Vitamin or Avitaminosis or vitamin D or Vitamin measurement or Vitamin intake) )<br>Indexes=SCI-EXPANDED Timespan=All years                                                                                                                                                                                                                                                                                                                                                                  |
| <b>#1</b> | TI=(Crohn* or Crohn Disease or Crohn abscess or "Crohn's disease of small intestine" or Crohn Disease like Reaction or "Crohn's disease of large bowel" or Crohns disease aggravated or Crohns associated arthritis or Arthropathy in Crohn's disease or Juvenile arthritis in Crohn disease or abscess Crohn large intestine or arthritis Crohn manifestation or small intestine abscess regional enteritis or Crohn with large intestine with small intestine or abscess Crohn small intestine with large intestine) OR AB=(Crohn* or Crohn Disease or Crohn abscess or "Crohn's disease of small intestine" or Crohn Disease like Reaction or "Crohn's disease of large bowel" or Crohns disease aggravated or Crohns associated arthritis or Arthropathy in Crohn's disease or Juvenile arthritis in Crohn disease or abscess Crohn large intestine or arthritis Crohn manifestation or small intestine abscess regional enteritis or Crohn with large intestine with small intestine or abscess Crohn small intestine with large intestine) Indexes=SCI-EXPANDED Timespan=All years |

### [Supplementary S2: Study quality checklist](#)

- 1) Was micronutrient insufficiency or status a primary stated objective of the study?
- 2) Was there exclusion of or adequate reporting of confounding factors such as:
  - a. Serum inflammatory markers?
  - b. Previous bowel resections?
  - c. Supplement use?
- 3) If not an exclusion or separate analysis, were the following characteristics of the cohort representative of a current outpatient CD population? (in a country with access to biological medications)
  - a. Inflammatory state

- b. Previous bowel resections
  - c. Supplement use
- 4) Were subjects recruited in a clearly defined, acceptable way to minimise bias?  
(Classed Yes / Unclear / No)
- 5) Was the micronutrient status recorded prospectively?
- 6) Were micronutrient data reported in a clear way (i.e., not on graphs alone, with defined cut off for deficiency prevalence studies, and with appropriate statistical tests for HC comparison studies)?
- 7) If CD subjects in clinical remission were reported separately or this was an inclusion criterion, was remission clearly defined?
- 8) If those in remission were not reported separately, was the percentage of subjects in clinical remission clearly defined?
- 9) Overall quality? (Low / Medium / High)

Supplementary S3: Data extracted from eligible studies

Vitamin A (Retinol)

| Vitamin A<br>Author [main<br>text ref] | Year | N CD<br>(HC) | P/<br>R | Data on %<br>Deficiency<br>in CD | CD<br>vs<br>HC | Separate<br>reporting of<br>remission?<br>Definition of<br>remission<br>or Cohort<br>characteristics<br>(CCh)                                                                           | Prevalence of<br>Deficiency<br>In CD remission<br>group or if not<br>separately reported<br>in CD group<br><br>Difference vs HC                                                    | Supports<br>Vit A<br>deficiency being<br>present<br>in CD<br>remission | Supports Vit A<br>status being<br>altered in Cd<br>remission in<br>comparison<br>with healthy<br>controls (HC) | Exploration of cause<br>Subgroup analysis or<br>Special tests                                                                                                                                                           | Overall<br>Quality<br>(see<br>table 2) |
|----------------------------------------|------|--------------|---------|----------------------------------|----------------|-----------------------------------------------------------------------------------------------------------------------------------------------------------------------------------------|------------------------------------------------------------------------------------------------------------------------------------------------------------------------------------|------------------------------------------------------------------------|----------------------------------------------------------------------------------------------------------------|-------------------------------------------------------------------------------------------------------------------------------------------------------------------------------------------------------------------------|----------------------------------------|
| Schoelmerich<br>[21]                   | 1985 | 54<br>(19)   | P       |                                  | X              | Yes, reports<br>“mildly active”<br>CDAI <150, mild<br>laboratory<br>changes no<br>active symptoms<br>and “inactive”<br>with CDAI<150,<br>no laboratory<br>changes or<br>active symptoms | Vit A lower in mildly<br>active CD group vs HC<br>45.5+/-16.5 µg/dl vs<br>67.3+/-9.1<br>(p<0.01)<br><br>Vit A among<br>“inactive” CD, vs HC<br>67.3+/-9.1 vs 69.9+/-<br>16<br>(NS) | Not<br>reported                                                        | Yes, but in the<br>group with<br>CDAI<150 and<br>mild<br>symptoms<br>only                                      | Strong negative<br>correlation with CDAI<br><i>R</i> -0.6196<br><i>p</i> <0.001                                                                                                                                         | Medium                                 |
| Geerling<br>[16]                       | 1998 | 32<br>(32)   | P       | X                                | X              | No separate<br>remission group<br><br>(CCh):<br>Median CDAI<br>139,<br>53% remission<br>(CDAI <150)                                                                                     | 28% (0.9µmol/L)<br><br>No CD diff v HC<br>2.6 +/-1.3 µmol/L vs<br>2.5 +/- 0.06 µmol/L<br>NS                                                                                        | Yes                                                                    | No                                                                                                             | Intake of Vitamin A<br>assessed with FFQ:<br>Less than RDA in<br>69% CD and 91% HC.<br>Intake not different<br><br>No reported intake vs<br>serum correlation<br>analyses.<br>Nil analysis Vit A vs<br>disease activity | Medium                                 |

| <b>Vitamin A</b><br>Author [main text ref] | Year | N CD (HC) | P/R | Data on % Deficiency in CD | CD vs HC | Separate reporting of remission? Definition of remission or Cohort characteristics (CCh) | Prevalence of Deficiency In CD remission group or if not separately reported in CD group<br><br>Difference vs HC             | Supports Vit A deficiency being present in CD remission | Supports Vit A status being altered in Cd remission in comparison with healthy controls (HC) | Exploration of cause Subgroup analysis or Special tests                                                                                                                                                                         | Overall Quality (see table 2) |
|--------------------------------------------|------|-----------|-----|----------------------------|----------|------------------------------------------------------------------------------------------|------------------------------------------------------------------------------------------------------------------------------|---------------------------------------------------------|----------------------------------------------------------------------------------------------|---------------------------------------------------------------------------------------------------------------------------------------------------------------------------------------------------------------------------------|-------------------------------|
| Geerling [17]                              | 1999 | 62 (70)   | P   |                            | X        | Yes<br><br>(defined by Van Hees <150)                                                    | No prevalence<br><br>Comparison: Vitamin A in CD remission vs HC not different.<br><br>Vit A lower in active vs remission CD | Not reported                                            | No                                                                                           | No assessment of intake<br>Median serum Vit A in 12 with active CD (CDAI >150) compared with 50 CD remission- NS<br><br>Vitamin A in the same individuals who were in remission and relapsed was significantly lower in relapse | Medium                        |
| Genser [24]                                | 1999 | 24 (33)   | P   |                            | X        | Remission not reported separately<br>CCh: 87% in remission (CDAI <150)                   | Retinol in CD 44.69+/-9.18 µg/dl<br>Vs 51.44+/-12.71 in HC<br>NS                                                             | Not clear / reported                                    | No                                                                                           | The total radical-trapping antioxidant potential (TRAP) lower in CD vs HC                                                                                                                                                       | Medium                        |

| <b>Vitamin A</b><br>Author [main text ref] | Year | N CD (HC) | P/R | Data on % Deficiency in CD | CD vs HC | Separate reporting of remission? Definition of remission or Cohort characteristics (CCh)                        | Prevalence of Deficiency In CD remission group or if not separately reported in CD group<br><br>Difference vs HC                 | Supports Vit A deficiency being present in CD remission | Supports Vit A status being altered in Cd remission in comparison with healthy controls (HC) | Exploration of cause Subgroup analysis or Special tests                                                                                                                                                                                  | Overall Quality (see table 2) |
|--------------------------------------------|------|-----------|-----|----------------------------|----------|-----------------------------------------------------------------------------------------------------------------|----------------------------------------------------------------------------------------------------------------------------------|---------------------------------------------------------|----------------------------------------------------------------------------------------------|------------------------------------------------------------------------------------------------------------------------------------------------------------------------------------------------------------------------------------------|-------------------------------|
| Geerling [18]                              | 2000 | 23 (23)   | P   |                            | X        | Remission not reported separately<br>CCh:<br>87% in remission (CDAI <150)<br>Mean (+/-SD) CDAI 96.9+/-66.5      | Mean +/-SD in CD: 2.2+/-0.8<br>Vs<br>HC: 2.4+/-0.6<br>NS                                                                         | Not clear / reported                                    | No                                                                                           | Intake of Vitamin A assessed with FFQ and diary<br>CD vs HC NS<br>No reported intake vs serum correlation analyses.                                                                                                                      | High                          |
| Wendland [28]                              | 2000 | 34 (37)   | P   |                            | X        | Not for comparison of Vit A with HC<br><br>CCh:<br>70% in remission (CDAI <150)<br>CDAI Mean +/- SEM 141+/-18.6 | Retinol (mean +/- SEM) CD: 1.84+/-0.11<br>HC:1.96+/-0.07 NS<br><br>**mean +/- SEM in CDr (CDAI<150) 1.92+/-0.11. n HC comparison | Not reported                                            | No                                                                                           | Intake not reduced vs HC n 7d food diary. No correlation analyses of intake vs plasma.<br>Vit A correlated to serum orosomucoid (-), but not to CDAI or lipid peroxidation (as measured by breath pentanes, which was lower in CD vs HC) | Medium                        |

| Vitamin A<br>Author [main<br>text ref] | Year | N CD<br>(HC) | P/<br>R | Data on %<br>Deficiency<br>in CD | CD<br>vs<br>HC | Separate<br>reporting of<br>remission?<br>Definition of<br>remission<br>or Cohort<br>characteristics<br>(CCh) | Prevalence of<br>Deficiency<br>In CD remission<br>group or if not<br>separately reported<br>in CD group<br><br>Difference vs HC                                               | Supports<br>Vit A<br>deficiency being<br>present<br>in CD<br>remission | Supports Vit A<br>status being<br>altered in Cd<br>remission in<br>comparison<br>with healthy<br>controls (HC) | Exploration of cause<br>Subgroup analysis or<br>Special tests                                                                                                                                                                                                                                 | Overall<br>Quality<br>(see<br>table 2) |
|----------------------------------------|------|--------------|---------|----------------------------------|----------------|---------------------------------------------------------------------------------------------------------------|-------------------------------------------------------------------------------------------------------------------------------------------------------------------------------|------------------------------------------------------------------------|----------------------------------------------------------------------------------------------------------------|-----------------------------------------------------------------------------------------------------------------------------------------------------------------------------------------------------------------------------------------------------------------------------------------------|----------------------------------------|
| D'Odorico [26]                         | 2001 | 33<br>(386)  | ?       |                                  | X              | Not for<br>comparison of<br>Vit A with HC<br><br>CCh:<br>70% in remission<br>(CDAI <150)                      | Retinol lower in CD<br>than HC<br>1.67+/-0.1µmol/L<br>Vs<br>2.7+/-0.07µmol/L<br><i>P</i> <0.0001<br><br>Vit A- active vs<br>remission NS diff<br>1.55+/-0.5 vs 1.69+/-<br>0.1 | Not clear<br>/<br>reported                                             | Yes                                                                                                            | Intake compared<br>between CD and HC<br>by FFQ estimated<br>macronutrient, fruit<br>and veg. CD intake of<br>energy, protein and<br>Veg lower than HC<br><br>Vit A in remission<br>(n=23) vs active<br>(n=10) NS<br><br>BMI <20; Vit A 1.3+/-<br>0.13 vs >20 1.8+/-<br>0.07<br><i>P</i> 0.017 | Low                                    |



| <b>Vitamin A</b><br>Author [main text ref] | Year | N CD (HC) | P/R | Data on % Deficiency in CD | CD vs HC | Separate reporting of remission? Definition of remission or Cohort characteristics (CCh) | Prevalence of Deficiency In CD remission group or if not separately reported in CD group<br><br>Difference vs HC | Supports Vit A deficiency being present in CD remission | Supports Vit A status being altered in Cd remission in comparison with healthy controls (HC) | Exploration of cause Subgroup analysis or Special tests                                                                                                                                                                  | Overall Quality (see table 2) |
|--------------------------------------------|------|-----------|-----|----------------------------|----------|------------------------------------------------------------------------------------------|------------------------------------------------------------------------------------------------------------------|---------------------------------------------------------|----------------------------------------------------------------------------------------------|--------------------------------------------------------------------------------------------------------------------------------------------------------------------------------------------------------------------------|-------------------------------|
| Vagianos [34]                              | 2007 | 84        | P   | X                          | No       | No separate remission CD group<br><br>CCh: 61% in remission (HBI<5)                      | 1.23% (<360µg/L)                                                                                                 | Yes                                                     | Not reported                                                                                 | Intake assessed with FFQ then 4-day food diary then compared vs adequacy (defined as <66% dietary reference value (DRV))<br>Vit A intake inadequate in 30% CD Spearman Correlation of Intake / 100kcal vs serum Vit A NS | Medium                        |

| <b>Vitamin A</b><br>Author [main text ref] | Year | N CD (HC) | P/R | Data on % Deficiency in CD | CD vs HC | Separate reporting of remission? Definition of remission or Cohort characteristics (CCh) | Prevalence of Deficiency In CD remission group or if not separately reported in CD group<br><br>Difference vs HC                                            | Supports Vit A deficiency being present in CD remission | Supports Vit A status being altered in Cd remission in comparison with healthy controls (HC) | Exploration of cause Subgroup analysis or Special tests                                                                                                                                                                                                                                                                 | Overall Quality (see table 2) |
|--------------------------------------------|------|-----------|-----|----------------------------|----------|------------------------------------------------------------------------------------------|-------------------------------------------------------------------------------------------------------------------------------------------------------------|---------------------------------------------------------|----------------------------------------------------------------------------------------------|-------------------------------------------------------------------------------------------------------------------------------------------------------------------------------------------------------------------------------------------------------------------------------------------------------------------------|-------------------------------|
| Soares-Mota [46]                           | 2015 | 38 (33)   |     | X                          | X        | Remission not reported separately<br><br>CCh: 89%34/38 in remission (HBI<5)              | CD: 29% deficient (<1.05µmol/L)<br>Vs<br>HC: 12% $p<0.005$<br><br>Retinol dose response test (increase >20%)<br>37% CD +ve vs 12% HC (reflects liver store) | Yes                                                     | Yes                                                                                          | Retinol dose response (RDR) was performed to check adequacy of hepatic stores<br>Positive (increase of 20% 5 hours after 2500iU PO retinol palmitate) in 37% of CD vs 12% HC<br><br>Comparison of characteristics of those with and without low serum Vit A found lower BMI and Fat Mass (DEXA) in those with low Vit A | Medium                        |

| <b>Vitamin A</b><br>Author [main text ref] | Year | N CD (HC) | P/R | Data on % Deficiency in CD | CD vs HC | Separate reporting of remission? Definition of remission or Cohort characteristics (CCh)                                                            | Prevalence of Deficiency In CD remission group or if not separately reported in CD group<br><br>Difference vs HC | Supports Vit A deficiency being present in CD remission | Supports Vit A status being altered in Cd remission in comparison with healthy controls (HC) | Exploration of cause Subgroup analysis or Special tests                                                                                                                                                                                                                                                              | Overall Quality (see table 2) |
|--------------------------------------------|------|-----------|-----|----------------------------|----------|-----------------------------------------------------------------------------------------------------------------------------------------------------|------------------------------------------------------------------------------------------------------------------|---------------------------------------------------------|----------------------------------------------------------------------------------------------|----------------------------------------------------------------------------------------------------------------------------------------------------------------------------------------------------------------------------------------------------------------------------------------------------------------------|-------------------------------|
| MacMaster [20]                             | 2021 | 59        |     | X                          |          | All in clinical remission (HBI)<br>No separate CD<br><br>53% in biochem remission (BCR) (FCP < 250, CRP <10 albumin >35)<br>(not report separately) | 2% deficiency<br><br>1.0µmol/ml                                                                                  | Yes                                                     | Not reported                                                                                 | Relationship between albumin (ALB), faecal calprotectin (FCP) and c-reactive protein (CRP) explored with Spearman's RHO. Only ALB correlated (rho=0.20 p =0.061),<br><br>No exploration of phenotypic predictors of deficiency done.<br><br>Survival analysis of flare in subsequent 12 months found no relationship | Medium                        |

## Beta Carotene

| <b>β-Carotene</b><br>Author<br>[main text ref number] | Year | N CD HC | P/R | Data on % Deficiency in CD | CD vs HC | Separate reporting of remission? Definition of remission or Cohort characteristics (CCh) | Prevalence of Deficiency In CD remission group or if not separately reported in CD group Difference vs HC                       | Supports β-Carotene deficiency being present in CD remission | Supports β-Carotene status being altered in Cd remission in comparison with healthy controls (HC) | Subgroup analysis or exploration of cause or Special tests                                                                                                                          | Overall Quality (see table 2) |
|-------------------------------------------------------|------|---------|-----|----------------------------|----------|------------------------------------------------------------------------------------------|---------------------------------------------------------------------------------------------------------------------------------|--------------------------------------------------------------|---------------------------------------------------------------------------------------------------|-------------------------------------------------------------------------------------------------------------------------------------------------------------------------------------|-------------------------------|
| Geerling [16]                                         | 1998 | 32 (32) | P   | X                          | X        | No separate remission group (CCh): Median CDAI 139, 53% remission (CDAI <150)            | Prevalence of deficiency (<0.4μmol/L): 100% β-carotene lower CD: mean(+/-SD) 0.98+/-0.91 μmol/l Vs 2.33+/-0.70 in HC (P <0.001) | Yes                                                          | Yes                                                                                               | Intake of β-Carotene assessed with FFQ: Intake not different CD vs HC. No RDA for β-Carotene. Ratio of β-Carotene to lipids lower in CD Nil analysis β-Carotene vs disease activity | Medium                        |
| Geerling [18]                                         | 1999 | 62 (70) | P   |                            | X        | Yes, inclusion criteria for study (defined by Van Hees <150)                             | No prevalence β-Carotene lower in CD inactive: Median (IQR) 1.74 (1.28-2.45) vs 2.24(1.80-2.8) (P 0.003)                        | Not reported                                                 | Yes                                                                                               | Intake of β-Carotene assessed with FFQ but only comparison between CD active and CD remission NS<br><br>Serum β-Carotene in CDa lower than CDr 1.04 (0.71-1.54) vs 1.74(1.28-2.83)  | Medium                        |
| Genser [24]                                           | 1999 | 24 (33) | P   |                            | X        | Remission not reported separately (CCh): 87% in remission (CDAI <150)                    | No prevalence data β-carotene lower in CD: 16.20+/-12.42 μg/dl Vs 34.74+/-18.84 in HC (P <0.0001)                               | Not reported                                                 | Yes                                                                                               | The total radical-trapping antioxidant potential (TRAP) lower in CD vs HC                                                                                                           | Medium                        |

| <b>β-Carotene</b><br>Author<br>[main text ref number] | Year | N CD HC | P/R | Data on % Deficiency in CD | CD vs HC | Separate reporting of remission? Definition of remission or Cohort characteristics (CCh)                | Prevalence of Deficiency In CD remission group or if not separately reported in CD group Difference vs HC                                     | Supports β-Carotene deficiency being present in CD remission | Supports β-Carotene status being altered in Cd remission in comparison with healthy controls (HC) | Subgroup analysis or exploration of cause or Special tests                                                                                                                                                                                           | Overall Quality (see table 2) |
|-------------------------------------------------------|------|---------|-----|----------------------------|----------|---------------------------------------------------------------------------------------------------------|-----------------------------------------------------------------------------------------------------------------------------------------------|--------------------------------------------------------------|---------------------------------------------------------------------------------------------------|------------------------------------------------------------------------------------------------------------------------------------------------------------------------------------------------------------------------------------------------------|-------------------------------|
| Geerling [18]                                         | 2000 | 23 (69) | P   |                            | X        | Remission not reported separately (CCh): 87% in remission (CDAI <150) Mean (+/-SD) CDAI 96.9+/-66.5     | Prevalence not reported Mean +/-SD in CD: 2.2+/-1.3 Vs HC: 1.8+/-0.7 NS                                                                       | Not reported                                                 | No                                                                                                | Intake of β-Carotene assessed with FFQ and diary CD vs HC NS No reported intake vs serum correlation analyses.                                                                                                                                       | Medium                        |
| Wendland [28]                                         | 2001 | 34 (37) | P   |                            | X        | Not for comparison of β-Carotene with HC CCh: 70% in remission (CDAI <150) CDAI Mean +/- SEM 141+/-18.6 | β-Carotene (mean +/- SEM) lower in CD: 0.36+/-0.05 than in HC: 0.52+/-0.05 <i>P</i> <0.05<br><br>**mean +/- SEM in CDr (CDAI<150) 0.41+/-0.07 | Not reported                                                 | Yes for all CD vs HC, but CDr vs HC not reported                                                  | Intake not reduced vs HC on 7d food diary. No correlation analyses of intake vs plasma. Serum concentration correlated to CDAI (-), but not to serum orosomucoid or lipid peroxidation (as measured by breath pentanes, which was lower in CD vs HC) | Medium                        |

| <b>β-Carotene</b><br>Author<br>[main<br>text ref<br>number] | Year | N CD<br>HC | P/R | Data on %<br>Deficiency<br>in CD | CD<br>vs<br>HC | Separate reporting<br>of remission?<br>Definition of<br>remission<br>or Cohort<br>characteristics<br>(CCh) | Prevalence of<br>Deficiency<br>In CD remission<br>group or if not<br>separately reported<br>in CD group<br>Difference vs HC         | Supports β-<br>Carotene<br>deficiency<br>being<br>present in<br>CD<br>remission | Supports β-<br>Carotene status<br>being altered in<br>Cd remission in<br>comparison<br>with healthy<br>controls (HC) | Subgroup analysis or<br>exploration of cause<br>or<br>Special tests                                                                                                                                                                                       | Overall<br>Quality<br>(see<br>table 2) |
|-------------------------------------------------------------|------|------------|-----|----------------------------------|----------------|------------------------------------------------------------------------------------------------------------|-------------------------------------------------------------------------------------------------------------------------------------|---------------------------------------------------------------------------------|----------------------------------------------------------------------------------------------------------------------|-----------------------------------------------------------------------------------------------------------------------------------------------------------------------------------------------------------------------------------------------------------|----------------------------------------|
| D'Odoric<br>o<br>[26]                                       | 2001 | 23         | P   |                                  | X              | Not for comparison<br>of β-carotene with<br>HC<br><br>CCh:<br>70% in remission<br>(CDAI <150)              | Prevalence not<br>reported<br><br>β-carotene<br>(Mean +/-SD)<br>lower in CD:<br>0.41+/-0.08μmol/L Vs<br>HC 0.83+/-0.03<br>P <0.0001 | Not clear /<br>reported                                                         | Yes                                                                                                                  | Intake compared<br>between CD and HC<br>by FFQ estimated<br>macronutrient, fruit<br>and veg. CD intake of<br>energy, protein and<br>Veg lower than HC<br>β-Carotene lower in<br>active (n=10)<br>0.46+/-0.09 vs<br>remission (n=23)<br>0.11+/-0.04 P<0.05 | Low                                    |

| <b>β-Carotene</b><br>Author<br>[main text ref number] | Year | N CD HC | P/R | Data on % Deficiency in CD | CD vs HC | Separate reporting of remission? Definition of remission or Cohort characteristics (CCh)           | Prevalence of Deficiency In CD remission group or if not separately reported in CD group Difference vs HC                                                                                                                 | Supports β-Carotene deficiency being present in CD remission | Supports β-Carotene status being altered in Cd remission in comparison with healthy controls (HC) | Subgroup analysis or exploration of cause or Special tests                                                                                                                                                                                                                                          | Overall Quality (see table 2) |
|-------------------------------------------------------|------|---------|-----|----------------------------|----------|----------------------------------------------------------------------------------------------------|---------------------------------------------------------------------------------------------------------------------------------------------------------------------------------------------------------------------------|--------------------------------------------------------------|---------------------------------------------------------------------------------------------------|-----------------------------------------------------------------------------------------------------------------------------------------------------------------------------------------------------------------------------------------------------------------------------------------------------|-------------------------------|
| Filippi [19]                                          | 2006 | 54 (25) | P   | X                          |          | All in remission<br><br>CDAI<br>All subjects needed 3/12 (CDAI <150)<br><br>Mean CRP 6.6/-0.8mg/dl | Prevalence (no definition provided) 20% (estimated from graph)<br><br>Biochemical analysis of HC not reported (whether as prevalence of deficiency or results)<br><br>CD Subjects' mean or median β-carotene Not reported | Yes                                                          | Not clear / reported                                                                              | Mean Intake of β-carotene assessed with 3-day food diary in CD and compared vs HC:<br>CD lower than HC:<br>Females:<br>1461.76+/-339.98 vs 3254.36+/-569.76<br><i>P</i> <0.005<br>Males:<br>1720.84+/-314.74 vs 2933.00+/-494.76<br><i>P</i> <0.05 men<br>Both M and F CD intake <French RDA (2100) | Low                           |

| <b>β-Carotene</b><br>Author<br>[main text ref number] | Year | N CD HC | P/R | Data on % Deficiency in CD | CD vs HC | Separate reporting of remission? Definition of remission or Cohort characteristics (CCh) | Prevalence of Deficiency In CD remission group or if not separately reported in CD group Difference vs HC | Supports β-Carotene deficiency being present in CD remission | Supports β-Carotene status being altered in Cd remission in comparison with healthy controls (HC) | Subgroup analysis or exploration of cause or Special tests                                                                                                                                                                                                                            | Overall Quality (see table 2) |
|-------------------------------------------------------|------|---------|-----|----------------------------|----------|------------------------------------------------------------------------------------------|-----------------------------------------------------------------------------------------------------------|--------------------------------------------------------------|---------------------------------------------------------------------------------------------------|---------------------------------------------------------------------------------------------------------------------------------------------------------------------------------------------------------------------------------------------------------------------------------------|-------------------------------|
| Vagianos [34]                                         | 2007 | 84      | P   | X                          |          | No separate remission CD group<br><br>CCh:<br>61% in remission (HBI<5)                   | 29.3% (<1.1μmol/L)                                                                                        | Yes                                                          | Not clear / reported                                                                              | Intake assessed with FFQ then 4-day food diary then compared vs adequacy (defined as <66% dietary reference value (DRV))<br>Vit A intake inadequate in 30% CD<br><br>Spearman Correlation of Vit A Intake / 100kcal vs serum β-carotene weakly correlated <i>r</i> 0.27 <i>P</i> 0.02 | Medium                        |



### Vitamin D (25-OH D3)

| <b>Vitamin D (25 OH D)</b><br>Author<br>[main text<br>ref<br>number] | Year | N CD<br>(HC) | P/<br>R | Data on %<br>Deficiency<br>in CD | CD<br>vs<br>HC | Separate reporting<br>of remission?<br>Definition of<br>remission<br>or Cohort<br>characteristics<br>(CCh)                                              | Prevalence of<br>Deficiency<br>In CD remission<br>(CDr) group or if<br>not separately<br>reported in CD<br>group<br>Difference vs HC             | Supports<br>Vit D<br>deficiency<br>being<br>present in<br>CD<br>remission | Supports<br>Vitamin D status<br>being altered in<br>comparison<br>with healthy<br>controls (HC) | Subgroup analysis or<br>exploration of cause<br>Exploration of<br>consequences<br>Special tests                                                                                                     | Overall<br>Quality<br>(see<br>table 2) |
|----------------------------------------------------------------------|------|--------------|---------|----------------------------------|----------------|---------------------------------------------------------------------------------------------------------------------------------------------------------|--------------------------------------------------------------------------------------------------------------------------------------------------|---------------------------------------------------------------------------|-------------------------------------------------------------------------------------------------|-----------------------------------------------------------------------------------------------------------------------------------------------------------------------------------------------------|----------------------------------------|
| Duggan<br>[29]                                                       | 2004 | 44<br>(44)   | P       |                                  | X              | All in remission-<br>defined as the<br>Absence of GI<br>symptoms                                                                                        | Prevalence not<br>reported<br><br>Mean (SD) 25-OHD<br>mmol/L<br>CD: 75.0 (28.7) vs<br>HC: 105.3<br>(55.5) $P < 0.01$                             | Not<br>reported                                                           | Yes                                                                                             | Mean intake of<br>Vitamin D in CD and<br>HC not different                                                                                                                                           | Medium                                 |
| Tajika<br>[30]                                                       | 2004 | 33<br>(15)   | ?       | X                                | X              | No separate<br>reporting of<br>remission. CCh:<br>Mean CDAI<br>84.1 44.2 (range,<br>12.6–182.7)                                                         | 27.3% of CD<br>deficient<br>( $<10\text{ng/ml}$ )<br>Mean (SD) 25-OHD<br>CD: 15.2+/-6.5 vs<br>HC 16.9 +/-5.2<br>NS                               | Yes                                                                       | No                                                                                              | Strong relationship<br>between 25OH-D<br>level and both<br>disease duration ( $r$<br>0.46, $P$ 0.00)3 and<br>CDAI ( $r$ 0.44 $P$ 0.005)                                                             | High                                   |
| McCarthy<br>[31]                                                     | 2005 | 44<br>(66)   | P       | X                                | X              | All 44 in remission<br>at baseline<br>(defined by both<br>the absence of<br>gastrointestinal<br>symptoms and the<br>requirement for<br>corticosteroids) | 18.2% of CD<br>deficient<br>( $<50\text{nmol/L}$ )<br>Vs 4.5% of HC<br>Mean (SD) 25-OHD<br>CD: 75.0 (28.7) vs<br>HC 105.3 (55.5)<br>$P < 0.0001$ | Yes                                                                       | Yes                                                                                             | Vit D intake assessed<br>by FFQ. No difference<br>CD vs HC- no<br>correlation analysis<br>of intake vs serum<br>Urinary terminal n-<br>peptides elevated in<br>CD vs HC but<br>exploration vs Vit D | High                                   |

| <b>Vitamin D (25 OH D)</b><br>Author<br>[main text<br>ref<br>number] | Year | N CD<br>(HC) | P/<br>R | Data on %<br>Deficiency<br>in CD | CD<br>vs<br>HC | Separate reporting<br>of remission?<br>Definition of<br>remission<br>or Cohort<br>characteristics<br>(CCh) | Prevalence of<br>Deficiency<br>In CD remission<br>(CDr) group or if<br>not separately<br>reported in CD<br>group<br>Difference vs HC                                                                                                                        | Supports<br>Vit D<br>deficiency<br>being<br>present in<br>CD<br>remission | Supports<br>Vitamin D status<br>being altered in<br>comparison<br>with healthy<br>controls (HC) | Subgroup analysis or<br>exploration of cause<br>Exploration of<br>consequences<br>Special tests                                                                                                                                                                                          | Overall<br>Quality<br>(see<br>table 2) |
|----------------------------------------------------------------------|------|--------------|---------|----------------------------------|----------------|------------------------------------------------------------------------------------------------------------|-------------------------------------------------------------------------------------------------------------------------------------------------------------------------------------------------------------------------------------------------------------|---------------------------------------------------------------------------|-------------------------------------------------------------------------------------------------|------------------------------------------------------------------------------------------------------------------------------------------------------------------------------------------------------------------------------------------------------------------------------------------|----------------------------------------|
| Filippi<br>[19]                                                      | 2006 | 54<br>(25)   | P       | X                                |                | All in remission<br><br>CDAI<br>All subjects needed<br>3/12 (CDAI <150)<br><br>Mean CRP<br>6.6-/-0.8mg/dl  | Prevalence (no<br>definition provided)<br>10% of CDr<br>deficient (est. from<br>graph)<br>Biochemical<br>analysis of HC not<br>reported (whether<br>as prevalence of<br>deficiency or<br>results)<br>CDr Subjects' mean<br>or median 25-OHD<br>Not reported | Yes                                                                       | Not clear /<br>reported                                                                         | Mean Intake of 25-<br>OH D assessed with<br>3-day food diary in<br>CD and compared vs<br>HC in male and<br>female separately<br>Intake in CD f (n=28)<br>vs HC f (n=16) and CD<br>m (n=26) vs HC m<br>(n=9) <i>NS</i><br>Mean intake in CD<br>and HC m and f<br><French RDA<br>(5µg/day) | Low                                    |
| Gilman<br>[32]                                                       | 2006 | 58           | P       | X                                |                | Remission not<br>reported separately<br><br>48/58 (82.8%) in<br>remission (No GI<br>symptoms)              | 19% Deficient<br>(<50nmol/L) at<br>baseline (late<br>Summer)                                                                                                                                                                                                | Yes                                                                       | Not clear /<br>reported                                                                         | Multiple regression<br>found 25 OHD +<br>assoc. with<br>supplements, -<br>associated with<br>smoking. Study had<br>winter check showing<br>45% deficient, with<br>SB involvement also<br>predictive                                                                                      | High                                   |

| <b>Vitamin D (25 OH D)</b><br>Author<br>[main text<br>ref<br>number] | Year | N CD<br>(HC) | P/<br>R | Data on %<br>Deficiency<br>in CD | CD<br>vs<br>HC | Separate reporting<br>of remission?<br>Definition of<br>remission<br>or Cohort<br>characteristics<br>(CCh) | Prevalence of<br>Deficiency<br>In CD remission<br>(CDr) group or if<br>not separately<br>reported in CD<br>group<br>Difference vs HC                         | Supports<br>Vit D<br>deficiency<br>being<br>present in<br>CD<br>remission | Supports<br>Vitamin D status<br>being altered in<br>comparison<br>with healthy<br>controls (HC) | Subgroup analysis or<br>exploration of cause<br>Exploration of<br>consequences<br>Special tests                                                                                                                                                                                                                                       | Overall<br>Quality<br>(see<br>table 2) |
|----------------------------------------------------------------------|------|--------------|---------|----------------------------------|----------------|------------------------------------------------------------------------------------------------------------|--------------------------------------------------------------------------------------------------------------------------------------------------------------|---------------------------------------------------------------------------|-------------------------------------------------------------------------------------------------|---------------------------------------------------------------------------------------------------------------------------------------------------------------------------------------------------------------------------------------------------------------------------------------------------------------------------------------|----------------------------------------|
| Vagianos<br>[34]                                                     | 2007 | 84           | P       | X                                |                | No separate<br>remission CD group<br><br>CCh:<br>61% in remission<br>(HBI<5)                               | 45.8%<br>(<50nmol/L) at<br>inter time-point                                                                                                                  | Yes                                                                       | Not clear /<br>reported                                                                         | Intake assessed with<br>FFQ then 4-day food<br>diary inc<br>supplements then<br>compared vs<br>adequacy (defined as<br><66% dietary<br>reference value<br>(DRV)) Intake<br>inadequate in 38%<br>CD<br>Spearman<br>Correlation of Vit D<br>Intake / 100kcal vs<br>serum 25OH D<br>strongly correlated <i>r</i><br>0.41 <i>P</i> <0.001 | Medium                                 |
| Nakajima<br>[37]                                                     | 2011 | 47<br>(41)   | P       |                                  | X              | No separate<br>remission group<br><br>Cohort<br>characteristics<br>Mean (+/-SD) CDAI:<br>107.6+/-88.0 50%  | Prevalence not<br>reported<br><br>25 OH-D reported<br>as significantly<br>higher in CD than<br>HC ( <i>P</i> <0.05) but<br>values only<br>displayed on graph | Not<br>reported                                                           | Yes                                                                                             | 25-OH Not correlated<br>with to CDAI.                                                                                                                                                                                                                                                                                                 | Low                                    |

| <b>Vitamin D (25 OH D)</b><br>Author<br>[main text<br>ref<br>number] | Year | N CD<br>(HC) | P/<br>R | Data on %<br>Deficiency<br>in CD | CD<br>vs<br>HC | Separate reporting<br>of remission?<br>Definition of<br>remission<br>or Cohort<br>characteristics<br>(CCh)                                         | Prevalence of<br>Deficiency<br>In CD remission<br>(CDr) group or if<br>not separately<br>reported in CD<br>group<br>Difference vs HC | Supports<br>Vit D<br>deficiency<br>being<br>present in<br>CD<br>remission | Supports<br>Vitamin D status<br>being altered in<br>comparison<br>with healthy<br>controls (HC) | Subgroup analysis or<br>exploration of cause<br>Exploration of<br>consequences<br>Special tests                                                                                                                                                                                                                                                                                 | Overall<br>Quality<br>(see<br>table 2) |
|----------------------------------------------------------------------|------|--------------|---------|----------------------------------|----------------|----------------------------------------------------------------------------------------------------------------------------------------------------|--------------------------------------------------------------------------------------------------------------------------------------|---------------------------------------------------------------------------|-------------------------------------------------------------------------------------------------|---------------------------------------------------------------------------------------------------------------------------------------------------------------------------------------------------------------------------------------------------------------------------------------------------------------------------------------------------------------------------------|----------------------------------------|
| Nic<br>Suibhne<br>[38]                                               | 2012 | 81<br>(70)   | P       | X                                | X              | Remission not<br>reported separately<br>No separate<br>remission CD group<br><br>CCh:<br>(median CDAI 92.09<br>(IQR 39-164)<br>CRP 3.85 (2.9-9.6)) | 63% in CD<br>(<50nmol/L)<br>Vs 55% HC (NS)<br><br>Mean (+/-SD) level<br>CD 47.76+/-27.27<br>vs HC 51.86+/-<br>24.53 (NS)             | Yes                                                                       | No                                                                                              | Daily Intake from diet<br>alone assessed FFQ.<br>Lower in CD than HC.<br>1.0µg/day vs<br>1.6µg/day $P<0.001$<br>43% Cd took<br>supplement vs 16%<br>HC<br>Regression analysis<br>identified winter<br>season, smoking and<br>longer disease<br>duration as<br>associations. BMI,<br>CRP, disease location<br>age and gender<br>surgery and steroid<br>use did not<br>contribute | High                                   |

| <b>Vitamin D (25 OH D)</b><br>Author<br>[main text<br>ref<br>number] | Year | N CD<br>(HC) | P/<br>R | Data on %<br>Deficiency<br>in CD | CD<br>vs<br>HC | Separate reporting<br>of remission?<br>Definition of<br>remission<br>or Cohort<br>characteristics<br>(CCh)                                                                      | Prevalence of<br>Deficiency<br>In CD remission<br>(CDr) group or if<br>not separately<br>reported in CD<br>group<br>Difference vs HC                                                                                                           | Supports<br>Vit D<br>deficiency<br>being<br>present in<br>CD<br>remission | Supports<br>Vitamin D status<br>being altered in<br>comparison<br>with healthy<br>controls (HC) | Subgroup analysis or<br>exploration of cause<br>Exploration of<br>consequences<br>Special tests                             | Overall<br>Quality<br>(see<br>table 2) |
|----------------------------------------------------------------------|------|--------------|---------|----------------------------------|----------------|---------------------------------------------------------------------------------------------------------------------------------------------------------------------------------|------------------------------------------------------------------------------------------------------------------------------------------------------------------------------------------------------------------------------------------------|---------------------------------------------------------------------------|-------------------------------------------------------------------------------------------------|-----------------------------------------------------------------------------------------------------------------------------|----------------------------------------|
| Garg<br>[41]                                                         | 2013 | 40<br>(23)   | P       | X                                | X              | Remission not<br>reported separately<br>No separate<br>remission CD group<br><br>CCh:<br>Median (range) HBI<br>3 (0-16)<br>Remission defined<br>by CRP <5 and<br>FCP<150 in 55% | 23% in CD<br>(<50nmol/L)<br>Vs<br>26% in HC<br>NS<br><br>Mean (CI) 25OHD<br>In CD: 70 (61-78)<br>Vs.<br>HC: 66 (56-76)<br>NS                                                                                                                   | Yes                                                                       | No                                                                                              | 25 OHD inversely<br>moderately<br>correlated to faecal<br>calprotectin (but not<br>CRP)<br>Pearson's r =-0.35,<br>P 0.040), | Medium                                 |
| Grunbaum<br>[42]                                                     | 2013 | 34           | P       | X                                | X              | Remission not<br>reported separately<br><br>CCh:<br>79.% Remission<br>(HBI<5)<br>20.6% "mildly<br>active" (HBI>5)                                                               | 29.4% in CD<br>(<50nmol/L)<br>12.7% in Healthy<br>family, 22.9% in HC<br><br>Mean (+/-SD)<br>25OHD in CD<br>71.1+/-31.1 vs<br>family 32.2+/-34.2<br>and HC 68.3+/-27.6<br><br>p value for CD<br>comparison vs<br>family and HC not<br>reported | Yes                                                                       | Not clear /<br>reported                                                                         | Nil separate analysis<br>of 25 OH D correlates<br>in IBD cases.                                                             | Low                                    |

| <b>Vitamin D (25 OH D)</b><br>Author<br>[main text<br>ref<br>number] | Year | N CD<br>(HC) | P/<br>R | Data on %<br>Deficiency<br>in CD | CD<br>vs<br>HC | Separate reporting<br>of remission?<br>Definition of<br>remission<br>or Cohort<br>characteristics<br>(CCh)                                                                                 | Prevalence of<br>Deficiency<br>In CD remission<br>(CDr) group or if<br>not separately<br>reported in CD<br>group<br>Difference vs HC                    | Supports<br>Vit D<br>deficiency<br>being<br>present in<br>CD<br>remission | Supports<br>Vitamin D status<br>being altered in<br>comparison<br>with healthy<br>controls (HC) | Subgroup analysis or<br>exploration of cause<br>Exploration of<br>consequences<br>Special tests                                                                                                                                                                                                                                 | Overall<br>Quality<br>(see<br>table 2) |
|----------------------------------------------------------------------|------|--------------|---------|----------------------------------|----------------|--------------------------------------------------------------------------------------------------------------------------------------------------------------------------------------------|---------------------------------------------------------------------------------------------------------------------------------------------------------|---------------------------------------------------------------------------|-------------------------------------------------------------------------------------------------|---------------------------------------------------------------------------------------------------------------------------------------------------------------------------------------------------------------------------------------------------------------------------------------------------------------------------------|----------------------------------------|
| Jorgensen<br>[43]                                                    | 2013 | 182          | P       |                                  | X              | Comparative<br>statistics with HC<br>only performed<br>with whole CD<br>cohort<br><br>CCh: 102/182 in<br>remission (CDAI<br><150)<br><br>mean 25 OHD<br>of CDAI<150<br>reported separately | Prevalence not<br>reported<br><br>Median 25OHD in<br>CD:<br>69nmol/L<br>Vs<br>HC: 65nmol/L<br>NS<br><br>Median Vit D<br>of 103 in remission<br>64nmol/L | Not clear /<br>reported                                                   | No                                                                                              | 25 OH D compared<br>between CDAI<br>defined remission,<br>mild moderate and<br>severe.<br>Inversely related:<br>remission 64, mild:<br>49, moderately active<br>21<br>(Kruskal's and<br>spearman's rho<br><0.01). similar, less<br>pronounced trend<br>with CRP. Higher<br>supplement use<br>noted in CD (44%)<br>than HC (10%) | Low                                    |
| Kini<br>[44]                                                         | 2014 | 32           | P       | X                                |                | Remission not<br>reported separately<br><br>CCh:<br>Mean CDAI Winter<br>(only data<br>extracted) 103.9<br>(Range 10-279, SD<br>76.9)                                                       | 76% deficient in<br>Winter<br>(<50nmol/L)                                                                                                               | Yes                                                                       | Not reported                                                                                    | No correlation was<br>found between<br>seasonal serum<br>Vitamin D levels and<br>CDAI                                                                                                                                                                                                                                           | Medium                                 |

| <b>Vitamin D (25 OH D)</b><br>Author<br>[main text<br>ref<br>number] | Year | N CD<br>(HC) | P/<br>R | Data on %<br>Deficiency<br>in CD | CD<br>vs<br>HC | Separate reporting<br>of remission?<br>Definition of<br>remission<br>or Cohort<br>characteristics<br>(CCh) | Prevalence of<br>Deficiency<br>In CD remission<br>(CDr) group or if<br>not separately<br>reported in CD<br>group<br>Difference vs HC                  | Supports<br>Vit D<br>deficiency<br>being<br>present in<br>CD<br>remission | Supports<br>Vitamin D status<br>being altered in<br>comparison<br>with healthy<br>controls (HC)             | Subgroup analysis or<br>exploration of cause<br>Exploration of<br>consequences<br>Special tests                                                                                                                                                                 | Overall<br>Quality<br>(see<br>table 2) |
|----------------------------------------------------------------------|------|--------------|---------|----------------------------------|----------------|------------------------------------------------------------------------------------------------------------|-------------------------------------------------------------------------------------------------------------------------------------------------------|---------------------------------------------------------------------------|-------------------------------------------------------------------------------------------------------------|-----------------------------------------------------------------------------------------------------------------------------------------------------------------------------------------------------------------------------------------------------------------|----------------------------------------|
| Raffner<br>Basson<br>[48]                                            | 2016 | 44           | P       | X                                |                | Yes, Remission<br>(HBI<5) reported<br>separately                                                           | 14% of CDr<br>deficient<br>(≤20 ng/mL)<br>30% of CDr<br>insufficient<br>(≤30 ng/mL)<br>Vs.<br>53% of HC deficient<br>And<br>89% of HC<br>insufficient | Yes                                                                       | No, prevalence<br>of deficiency<br>higher in HC<br>than CDr (no<br>direct<br>comparison of<br>25OHD levels) | Primary aim of study<br>was to compare the<br>prevalence of<br>deficiency as<br>grouped by HBI. This<br>demonstrated<br>progressive increase<br>in deficiency at HBI 5-<br>7 (28%) and ≥8<br>(45%), respectively.                                               | Medium                                 |
| Frigstad<br>[50]                                                     | 2017 | 230          | P       | X                                |                | Remission not<br>reported separately<br><br>CCh:<br>53% in remission<br>(HBI<5)<br>Median HBI 4            | 53% insufficient<br>(<50nmol/L)<br>8% severely<br>deficient<br>(<25nmol/L)                                                                            | Yes                                                                       |                                                                                                             | Risk Factors for low<br>25OHD in<br>multivariate analysis:<br>HBI>8:<br>OR 3.06 (95% CI 1.27-<br>7.35)<br>BMI >25<br>OR 1.95 (95% CI 1.03-<br>3.70) (smoking, age<br>gender, resections,<br>disease duration pr<br>behaviour,<br>medications not<br>associated) | High                                   |

| <b>Vitamin D (25 OH D)</b><br>Author<br>[main text<br>ref<br>number] | Year | N CD<br>(HC) | P/<br>R | Data on %<br>Deficiency<br>in CD | CD<br>vs<br>HC | Separate reporting<br>of remission?<br>Definition of<br>remission<br>or Cohort<br>characteristics<br>(CCh)   | Prevalence of<br>Deficiency<br>In CD remission<br>(CDr) group or if<br>not separately<br>reported in CD<br>group<br>Difference vs HC | Supports<br>Vit D<br>deficiency<br>being<br>present in<br>CD<br>remission | Supports<br>Vitamin D status<br>being altered in<br>comparison<br>with healthy<br>controls (HC) | Subgroup analysis or<br>exploration of cause<br>Exploration of<br>consequences<br>Special tests                                                                                                                                    | Overall<br>Quality<br>(see<br>table 2) |
|----------------------------------------------------------------------|------|--------------|---------|----------------------------------|----------------|--------------------------------------------------------------------------------------------------------------|--------------------------------------------------------------------------------------------------------------------------------------|---------------------------------------------------------------------------|-------------------------------------------------------------------------------------------------|------------------------------------------------------------------------------------------------------------------------------------------------------------------------------------------------------------------------------------|----------------------------------------|
| Cavaziel<br>[51]                                                     | 2018 | 99           | P       | X                                | No             | Remission not<br>reported separately<br><br>CCh:<br>70% in clinical<br>remission (HBI<5)                     | 58% (<50nmol/L)                                                                                                                      | Yes                                                                       | Not reported                                                                                    | In a linear regression<br>model adjusted for<br>age, gender, and<br>BMI, a significant<br>inverse association of<br>C-reactive protein<br>(CRP) (p = 0.031) and<br>faecal calprotectin<br>(FC) (p = 0.025) with<br>25-OH-D3 levels | Medium                                 |
| Branco<br>[52]                                                       | 2019 | 106          | P       | X                                | No             | Remission not<br>reported separately<br>CCh:<br>71.9% in remission<br>(HBI<5)<br>Mean(+/-SD) HBI:<br>2.7+/-3 | 90.8% Insufficient<br>(21-29ng/ml)<br>75% Deficient<br>(<20ng/ml)<br>24% Severe<br>deficiency<br>(<10ng/ml)                          | Yes                                                                       | Not reported                                                                                    | 25-OH D negatively<br>correlated with CRP<br>HBI and age                                                                                                                                                                           | High                                   |



| <b>Vitamin D (25 OH D)</b><br>Author<br>[main text<br>ref<br>number] | Year | N CD<br>(HC)                   | P/<br>R | Data on %<br>Deficiency<br>in CD | CD<br>vs<br>HC | Separate reporting<br>of remission?<br>Definition of<br>remission<br>or Cohort<br>characteristics<br>(CCh) | Prevalence of<br>Deficiency<br>In CD remission<br>(CDr) group or if<br>not separately<br>reported in CD<br>group<br>Difference vs HC | Supports<br>Vit D<br>deficiency<br>being<br>present in<br>CD<br>remission | Supports<br>Vitamin D status<br>being altered in<br>comparison<br>with healthy<br>controls (HC) | Subgroup analysis or<br>exploration of cause<br>Exploration of<br>consequences<br>Special tests                                                                                                                                                                                                                                                                                                                                                   | Overall<br>Quality<br>(see<br>table 2) |
|----------------------------------------------------------------------|------|--------------------------------|---------|----------------------------------|----------------|------------------------------------------------------------------------------------------------------------|--------------------------------------------------------------------------------------------------------------------------------------|---------------------------------------------------------------------------|-------------------------------------------------------------------------------------------------|---------------------------------------------------------------------------------------------------------------------------------------------------------------------------------------------------------------------------------------------------------------------------------------------------------------------------------------------------------------------------------------------------------------------------------------------------|----------------------------------------|
| Olmedo-<br>Martín<br>[55]                                            | 2019 | 150<br>(104<br>remis-<br>sion) | P       | X                                |                | Yes<br>HBI <5                                                                                              | 23.1% of 104 CDr<br>deficient<br>(<20ng/ml)                                                                                          | Yes                                                                       | Not reported                                                                                    | Proportion of CD<br>subjects with<br>deficiency higher in<br>Winter than summer:<br>48.5% vs 21.4%;<br><i>P</i> <0.001<br><br>When grouped by 25<br>OHD deficient /<br>insufficient /<br>adequate statistically<br>significant difference<br>FCP between groups<br>(104.8 vs 84 vs 47.2)<br>ANOVA <i>P</i> 0.002 and<br>higher % with HBI<br>active disease in<br>deficiency vs<br>inadequate vs<br>adequate (34%, 24%<br>and 7%) <i>P</i> <0.001 | High                                   |

| <b>Vitamin D (25 OH D)</b><br>Author<br>[main text<br>ref<br>number] | Year | N CD<br>(HC) | P/<br>R | Data on %<br>Deficiency<br>in CD | CD<br>vs<br>HC | Separate reporting<br>of remission?<br>Definition of<br>remission<br>or Cohort<br>characteristics<br>(CCh) | Prevalence of<br>Deficiency<br>In CD remission<br>(CDr) group or if<br>not separately<br>reported in CD<br>group<br>Difference vs HC | Supports<br>Vit D<br>deficiency<br>being<br>present in<br>CD<br>remission | Supports<br>Vitamin D status<br>being altered in<br>comparison<br>with healthy<br>controls (HC) | Subgroup analysis or<br>exploration of cause<br>Exploration of<br>consequences<br>Special tests                                                                                                                                                                                      | Overall<br>Quality<br>(see<br>table 2) |
|----------------------------------------------------------------------|------|--------------|---------|----------------------------------|----------------|------------------------------------------------------------------------------------------------------------|--------------------------------------------------------------------------------------------------------------------------------------|---------------------------------------------------------------------------|-------------------------------------------------------------------------------------------------|--------------------------------------------------------------------------------------------------------------------------------------------------------------------------------------------------------------------------------------------------------------------------------------|----------------------------------------|
| Zhao<br>[56]                                                         | 2019 | 21<br>(120)  | P       |                                  | X              | Yes<br>HBI <5                                                                                              | CDr: 25 OHD<br>mean+/-SD<br>13.97+/-5.61<br>μmol/l<br><br>Vs<br>12.96+/-5.18 in HC<br>NS                                             | Not<br>reported                                                           | No                                                                                              | Mean 25 OHD of CDr,<br>compared with mild<br>moderate and severe<br>(by HBI)<br>25-OHD in CDr lower<br>than moderate or<br>severe CD<br>(12.18+/-3.69 vs<br>9.21+/-3.26 vs<br>7.58+/-3.81,<br>respectively) <i>P</i> <0.05                                                           | Low                                    |
| Domislovic<br>[57]                                                   | 2020 | 123          |         | X                                |                | Remission not<br>reported separately<br><br>CCh:<br>100/123 (81.3%) in<br>remission (HBI<5)                | 61.9% (<50nmol/L)                                                                                                                    | Yes                                                                       | Not clear /<br>reported                                                                         | 25 OH-D lower if ileal<br>involvement<br>Higher in those with<br>ileal or ileocolonic<br>resections, on anti<br>TNF or on a<br>supplement.<br>Mean 25 OH D not<br>different in active vs<br>inactive (HBI), if on<br>corticosteroids, on<br>immunomodulator or<br>colonic resections | Low                                    |

| <b>Vitamin D (25 OH D)</b><br>Author<br>[main text<br>ref<br>number] | Year | N CD<br>(HC) | P/<br>R | Data on %<br>Deficiency<br>in CD | CD<br>vs<br>HC | Separate reporting<br>of remission?<br>Definition of<br>remission<br>or Cohort<br>characteristics<br>(CCh)                                                         | Prevalence of<br>Deficiency<br>In CD remission<br>(CDr) group or if<br>not separately<br>reported in CD<br>group<br>Difference vs HC | Supports<br>Vit D<br>deficiency<br>being<br>present in<br>CD<br>remission | Supports<br>Vitamin D status<br>being altered in<br>comparison<br>with healthy<br>controls (HC) | Subgroup analysis or<br>exploration of cause<br>Exploration of<br>consequences<br>Special tests                                                                                                                                                                                               | Overall<br>Quality<br>(see<br>table 2) |
|----------------------------------------------------------------------|------|--------------|---------|----------------------------------|----------------|--------------------------------------------------------------------------------------------------------------------------------------------------------------------|--------------------------------------------------------------------------------------------------------------------------------------|---------------------------------------------------------------------------|-------------------------------------------------------------------------------------------------|-----------------------------------------------------------------------------------------------------------------------------------------------------------------------------------------------------------------------------------------------------------------------------------------------|----------------------------------------|
| MacMaster<br>[20]                                                    | 2021 | 59           | P       | X                                |                | All in clinical<br>remission (HBI)<br>No separate CD<br><br>53% in biochem<br>remission (BCR)<br>(FCP < 250, CRP <10<br>albumin >35)<br>(not report<br>separately) | 34%<br><br>25nmol/L                                                                                                                  | Yes                                                                       | Not clear /<br>reported                                                                         | Relationship between<br>albumin, FCP and crp<br>explored with<br>Spearman's RHO. No<br>correlation.<br><br>Exploration of<br>phenotypic predictors<br>of deficiency did not<br>report any predictors<br><br>Survival analysis of flare<br>in subsequent 12<br>months found no<br>relationship | Medium                                 |

## Vitamin E

| Vitamin E<br>Author<br>[main text<br>ref number] | Year | N CD<br>(HC) | P/R | Data<br>on %<br>Deficie<br>ncy in<br>CD | CD<br>vs<br>HC | Separate reporting<br>of remission?<br>Definition of<br>remission<br>or Cohort<br>characteristics<br>(CCh) | Prevalence of<br>Deficiency<br>In CD remission<br>group or if not<br>separately<br>reported in CD<br>group<br>Difference vs HC                                         | Supports Vit E<br>deficiency<br>being present<br>in CD<br>remission | Supports Vit E<br>status being<br>altered in Cd<br>remission in<br>comparison<br>with healthy<br>controls (HC) | Exploration of<br>cause<br>Subgroup analysis<br>or<br>Special tests                                                                                                                                                                      | Overall<br>Quality<br>(see<br>table 2) |
|--------------------------------------------------|------|--------------|-----|-----------------------------------------|----------------|------------------------------------------------------------------------------------------------------------|------------------------------------------------------------------------------------------------------------------------------------------------------------------------|---------------------------------------------------------------------|----------------------------------------------------------------------------------------------------------------|------------------------------------------------------------------------------------------------------------------------------------------------------------------------------------------------------------------------------------------|----------------------------------------|
| Geerling<br>[16]                                 | 1998 | 32<br>(32)   | P   | X                                       | X              | No separate<br>remission group<br><br>(CCh):<br>Median CDAI 139,<br>53% remission<br>(CDAI <150)           | 45% (from graph)<br>(<14µmol/L):<br><br>Vit E lower CD:<br>mean(+/-SD)<br>29.2+/-10.7<br>µmol/l<br>Vs<br>34.8+/-8.6 in HC<br>(P <0.05)                                 | Yes                                                                 | Yes                                                                                                            | Intake of Vit E not<br>among<br>micronutrients<br>assessed<br>Ratio of Vit E to<br>serum lipids and<br>cholesterol same in<br>CD to HC<br>suggesting lower<br>cholesterol may<br>contribute to lower<br>Vit E in CD                      | Medium                                 |
| Geerling<br>[17]                                 | 1999 | 62<br>(70)   | P   |                                         | X              | Yes, mean of 50 Cd<br>remission reported<br><br>(defined by Van<br>Hees <150)                              | Prevalence of<br>deficiency not<br>reported<br><br>Median (IQR) in<br>CD remission:<br>29.0 (23.8-34.0)<br>µmol/l<br>Vs 31.0 (27.0-<br>38.3)<br>µmol/l in HC<br>P 0.05 | Not clear /<br>reported                                             | Yes                                                                                                            | Intake of assessed<br>with FFQ but only<br>comparison<br>between CD active<br>and CD remission<br><i>NS</i><br><br>Serum Vit E in CDa<br>vs CDr <i>NS</i><br><br>Exploratory<br>correlation<br>revealed Vit E<br>correlated with<br>PUFA | Medium                                 |

| Vitamin E<br>Author<br>[main text<br>ref number] | Year | N CD<br>(HC) | P/R | Data<br>on %<br>Deficie<br>ncy in<br>CD | CD<br>vs<br>HC | Separate reporting<br>of remission?<br>Definition of<br>remission<br>or Cohort<br>characteristics<br>(CCh)            | Prevalence of<br>Deficiency<br>In CD remission<br>group or if not<br>separately<br>reported in CD<br>group<br>Difference vs HC   | Supports Vit E<br>deficiency<br>being present<br>in CD<br>remission | Supports Vit E<br>status being<br>altered in Cd<br>remission in<br>comparison<br>with healthy<br>controls (HC) | Exploration of<br>cause<br>Subgroup analysis<br>or<br>Special tests                   | Overall<br>Quality<br>(see<br>table 2) |
|--------------------------------------------------|------|--------------|-----|-----------------------------------------|----------------|-----------------------------------------------------------------------------------------------------------------------|----------------------------------------------------------------------------------------------------------------------------------|---------------------------------------------------------------------|----------------------------------------------------------------------------------------------------------------|---------------------------------------------------------------------------------------|----------------------------------------|
| Genser<br>[24]                                   | 1999 | 24<br>(33)   | P   |                                         | X              | Remission not<br>reported separately<br>(CCh):<br>87% in remission<br>(CDAI <150)                                     | Vit E in CD:<br>1.07 mg/dl +/-<br>0.23<br>Vs HC:<br>1.07+/-0.28<br>NS                                                            | Not reported                                                        | No                                                                                                             | The total<br>radical-trapping<br>antioxidant potential<br>(TRAP) lower in CD vs<br>HC | Medium                                 |
| Geerling<br>[18]                                 | 2000 | 23           | P   |                                         | X              | Remission not<br>reported separately<br>(CCh):<br>87% in remission<br>(CDAI <150)<br>Mean (+/-SD) CDAI<br>96.9+/-66.5 | Prevalence of<br>deficiency not<br>reported<br><br>Mean +/- SD in<br>CD:<br>30.4+/-8.7µmol/L<br>Vs HC:<br>28.8+/-5.8µmol/L<br>NS | Not clear /<br>reported                                             | No                                                                                                             | Nil assessment of<br>intake<br><br>Vit E correlated to<br>serum cholesterol           | High                                   |

| Vitamin E<br>Author<br>[main text<br>ref number] | Year | N CD<br>(HC) | P/R | Data<br>on %<br>Deficie<br>ncy in<br>CD | CD<br>vs<br>HC | Separate reporting<br>of remission?<br>Definition of<br>remission<br>or Cohort<br>characteristics<br>(CCh)           | Prevalence of<br>Deficiency<br>In CD remission<br>group or if not<br>separately<br>reported in CD<br>group<br>Difference vs HC | Supports Vit E<br>deficiency<br>being present<br>in CD<br>remission | Supports Vit E<br>status being<br>altered in Cd<br>remission in<br>comparison<br>with healthy<br>controls (HC) | Exploration of<br>cause<br>Subgroup analysis<br>or<br>Special tests                                                                                                                                                                                                                       | Overall<br>Quality<br>(see<br>table 2) |
|--------------------------------------------------|------|--------------|-----|-----------------------------------------|----------------|----------------------------------------------------------------------------------------------------------------------|--------------------------------------------------------------------------------------------------------------------------------|---------------------------------------------------------------------|----------------------------------------------------------------------------------------------------------------|-------------------------------------------------------------------------------------------------------------------------------------------------------------------------------------------------------------------------------------------------------------------------------------------|----------------------------------------|
| Wendland<br>[28]                                 | 2001 | 34           | P   |                                         | X              | Not for comparison<br>of Vit A with HC<br>CCh:<br>70% in remission<br>(CDAI <150)<br>CDAI Mean +/- SEM<br>141+/-18.6 | Vit E (mean +/-<br>SEM) CD:<br>24.1+/-1.1<br>HC:22.7+/-0.62<br>NS<br><br>**mean +/- SEM<br>in CDr (CDAI<150)<br>23.3+/-1.23    | Not reported                                                        | No                                                                                                             | Intake not reduced<br>vs HC on 7-day food<br>diary. No<br>correlation<br>analyses of intake<br>vs plasma.<br>Serum<br>concentration not<br>correlated to CDAI,<br>serum<br>orosomucoid or<br>lipid peroxidation<br>(as measured by<br>breath pentanes,<br>which was lower in<br>CD vs HC) | Medium                                 |

| Vitamin E<br>Author<br>[main text<br>ref number] | Year | N CD<br>(HC) | P/R | Data<br>on %<br>Deficie<br>ncy in<br>CD | CD<br>vs<br>HC | Separate reporting<br>of remission?<br>Definition of<br>remission<br>or Cohort<br>characteristics<br>(CCh) | Prevalence of<br>Deficiency<br>In CD remission<br>group or if not<br>separately<br>reported in CD<br>group<br>Difference vs HC                      | Supports Vit E<br>deficiency<br>being present<br>in CD<br>remission | Supports Vit E<br>status being<br>altered in Cd<br>remission in<br>comparison<br>with healthy<br>controls (HC) | Exploration of<br>cause<br>Subgroup analysis<br>or<br>Special tests                                                                                                                                                                                                                     | Overall<br>Quality<br>(see<br>table 2) |
|--------------------------------------------------|------|--------------|-----|-----------------------------------------|----------------|------------------------------------------------------------------------------------------------------------|-----------------------------------------------------------------------------------------------------------------------------------------------------|---------------------------------------------------------------------|----------------------------------------------------------------------------------------------------------------|-----------------------------------------------------------------------------------------------------------------------------------------------------------------------------------------------------------------------------------------------------------------------------------------|----------------------------------------|
| D'Odorico<br>[26]                                | 2001 | 33           | P   |                                         | X              | Not for comparison<br>of Vit A with HC<br><br>CCh:<br>70% in remission<br>(CDAI <150)                      | Prevalence of<br>deficiency not<br>reported<br><br>Mean +/- SD in<br>CD:<br>17.8+/-<br>0.85µmol/L<br>Vs HC:<br>26.8+/-0.7µmol/L<br><i>P</i> <0.0001 | Not clear /<br>reported                                             | Yes                                                                                                            | Intake compared<br>between CD and HC<br>by FFQ estimated<br>macronutrient, fruit<br>and veg. CD intake<br>of energy, protein<br>and Veg lower than<br>HC<br>Vit E in remission vs<br>active <i>NS</i><br>Vit E if BMI <20 vs<br>BMI>20<br>13.4+/-1.5<br>vs.18.4+/-0.8<br><i>P</i> 0.029 | Low                                    |

| Vitamin E<br>Author<br>[main text<br>ref number] | Year | N CD<br>(HC) | P/R | Data<br>on %<br>Deficie<br>ncy in<br>CD | CD<br>vs<br>HC | Separate reporting<br>of remission?<br>Definition of<br>remission<br>or Cohort<br>characteristics<br>(CCh)                                                     | Prevalence of<br>Deficiency<br>In CD remission<br>group or if not<br>separately<br>reported in CD<br>group<br>Difference vs HC                                                           | Supports Vit E<br>deficiency<br>being present<br>in CD<br>remission | Supports Vit E<br>status being<br>altered in Cd<br>remission in<br>comparison<br>with healthy<br>controls (HC) | Exploration of<br>cause<br>Subgroup analysis<br>or<br>Special tests                                                                                                                                                                                                                           | Overall<br>Quality<br>(see<br>table 2) |
|--------------------------------------------------|------|--------------|-----|-----------------------------------------|----------------|----------------------------------------------------------------------------------------------------------------------------------------------------------------|------------------------------------------------------------------------------------------------------------------------------------------------------------------------------------------|---------------------------------------------------------------------|----------------------------------------------------------------------------------------------------------------|-----------------------------------------------------------------------------------------------------------------------------------------------------------------------------------------------------------------------------------------------------------------------------------------------|----------------------------------------|
| Fillippi [19]                                    | 2006 | 54<br>(25)   | P   | X                                       | ?              | All in remission<br><br>CDAI<br>All subjects needed<br>3/12 (CDAI <150)<br><br>Mean CRP<br>6.6-/-0.8mg/dl                                                      | Prevalence (no<br>definition<br>provided)<br>10% (estimated<br>from graph)<br><br>Biochemical<br>analysis of HC not<br>reported (either<br>as prevalence of<br>deficiency or<br>results) | Yes                                                                 | Not reported                                                                                                   | Mean Intake of Vit<br>E assessed with 3-<br>day food diary in<br>CD and compared<br>vs HC in male and<br>female separately<br>Intake in CD f<br>(n=28) vs HC f<br>(n=16) and CD m<br>(n=26) vs HC m<br>(n=9) NS<br>Both CD f and HC f<br>mean intake<br><French RDA<br>(12mg/day)             | Low                                    |
| MacMaster<br>[20]                                | 2021 | 59           |     | X                                       |                | All in clinical<br>remission (HBI)<br>No separate CD<br><br>53% in biochem<br>remission (BCR)<br>(FCP < 250, CRP <10<br>alb >35)<br>(not report<br>separately) | 2% deficiency<br><br>3.5 to 9.5<br>μmol/mmol<br>cholesterol                                                                                                                              | Yes (low<br>prevalence)                                             | Not reported                                                                                                   | Relationship between<br>alb, FCP and crp<br>explored with<br>Spearman's RHO- nil<br>correlation.<br>Exploration of<br>phenotypic predictors<br>of Vit E serum<br>concentrations found<br>no associations<br>Survival analysis of<br>flare in subsequent<br>12 months found no<br>relationship | Low                                    |



## Vitamin K

| <b>Vitamin K</b><br>Author<br>[main text<br>ref<br>number] | Year | N<br>CD<br>(HC) | P/R | Data on %<br>Deficiency<br>in CD | CD<br>vs<br>HC | Separate<br>reporting of<br>remission?<br>Definition of<br>remission<br>or Cohort<br>characteristics<br>(CCh)         | Prevalence of<br>Deficiency<br>In CD remission<br>group or if not<br>separately<br>reported in CD<br>group<br>Difference vs HC                                                                                   | Supports<br>Vitamin K<br>deficiency<br>being present<br>in CD<br>remission | Supports<br>Vitamin K<br>status being<br>altered in Cd<br>remission in<br>comparison<br>with healthy<br>controls (HC) | Exploration of<br>cause<br>Subgroup analysis<br>or<br>Special tests                                                                                                                                                    | Overall<br>Quality<br>(see<br>table 2) |
|------------------------------------------------------------|------|-----------------|-----|----------------------------------|----------------|-----------------------------------------------------------------------------------------------------------------------|------------------------------------------------------------------------------------------------------------------------------------------------------------------------------------------------------------------|----------------------------------------------------------------------------|-----------------------------------------------------------------------------------------------------------------------|------------------------------------------------------------------------------------------------------------------------------------------------------------------------------------------------------------------------|----------------------------------------|
| Schoon<br>[27]                                             | 2001 | 32<br>(34)      | P   |                                  | X              | All "in remission"-<br>although<br>definition of<br>remission not<br>reported.<br>CCh:<br>Mean (SD) CDAI:<br>106 (78) | Prevalence not<br>reported<br>Median Vit K<br>0.42ng/ml Cd<br>Vs<br>0.61 HC $P<0.01$<br><br>Undercarboxylated<br>osteocalcin<br>(Marker of Vitamin<br>K status, elevated<br>in deficiency)<br>higher in CD vs HC | Not reported                                                               | Yes                                                                                                                   | "Free"<br>uncarboxylated<br>osteocalcin lower<br>in CD, and was<br>inversely<br>correlated (and an<br>independent risk<br>factor in multiple<br>linear regression)<br>to lumbar spine<br>bone mineral<br>density (BMD) | Medium                                 |

| Vitamin K<br>Author<br>[main text<br>ref<br>number] | Year | N<br>CD<br>(HC) | P/R | Data on %<br>Deficiency<br>in CD | CD<br>vs<br>HC | Separate<br>reporting of<br>remission?<br>Definition of<br>remission<br>or Cohort<br>characteristics<br>(CCh) | Prevalence of<br>Deficiency<br>In CD remission<br>group or if not<br>separately<br>reported in CD<br>group<br>Difference vs HC                                                           | Supports<br>Vitamin K<br>deficiency<br>being present<br>in CD<br>remission | Supports<br>Vitamin K<br>status being<br>altered in Cd<br>remission in<br>comparison<br>with healthy<br>controls (HC) | Exploration of<br>cause<br>Subgroup analysis<br>or<br>Special tests                                                                                                                                                                                                                                         | Overall<br>Quality<br>(see<br>table 2) |
|-----------------------------------------------------|------|-----------------|-----|----------------------------------|----------------|---------------------------------------------------------------------------------------------------------------|------------------------------------------------------------------------------------------------------------------------------------------------------------------------------------------|----------------------------------------------------------------------------|-----------------------------------------------------------------------------------------------------------------------|-------------------------------------------------------------------------------------------------------------------------------------------------------------------------------------------------------------------------------------------------------------------------------------------------------------|----------------------------------------|
| Duggan<br>[29]                                      | 2004 | 44<br>(44)      | X   | X                                | X              | All in remission-<br>defined as the<br>Absence of GI<br>symptoms                                              | Prevalence not<br>reported<br><br>Undercarboxylated<br>osteocalcin marker<br>of Vitamin K<br>status, elevated in<br>CD 5.1ng/mL vs<br>HC 3.9 ng/mL<br><i>P</i> <0.05                     | Not reported                                                               | Yes                                                                                                                   | Vitamin K intake<br>estimated by FFQ:<br>Trend to lower<br>intake CD: 117µg<br>vs HC: 147<br><i>P</i> 0.059<br>Also measured<br>marker of bone<br>turnover: Urinary<br>N-Telopeptide<br>cross-linked type I<br>collagen as marker<br>of bone turnover-<br>correlated to<br>Undercarboxylated<br>osteocalcin | Low                                    |
| Nakajima<br>[37]                                    | 2011 | 47<br>(41)      | P   |                                  | X              | No separate<br>remission group<br><br>Cohort<br>characteristics:<br>Mean (+/-SD)<br>CDAI:<br>107.6+/-88.0     | Prevalence not<br>reported<br><br>Undercarboxylated<br>osteocalcin<br>reported as<br>significantly higher<br>in CD than HC<br>( <i>P</i> <0.05) but values<br>only displayed on<br>graph | Not reported                                                               | Yes                                                                                                                   | Undercarboxylated<br>osteocalcin was<br>correlated to CDAI<br>( <i>R</i> =0.36, <i>P</i> <0.0001)<br><br>BMI, CRP not<br>correlated                                                                                                                                                                         | Low                                    |

| <b>Vitamin K</b><br>Author<br>[main text<br>ref<br>number] | Year | N<br>CD<br>(HC) | P/R | Data on %<br>Deficiency<br>in CD | CD<br>vs<br>HC | Separate<br>reporting of<br>remission?<br>Definition of<br>remission<br>or Cohort<br>characteristics<br>(CCh)                                                  | Prevalence of<br>Deficiency<br>In CD remission<br>group or if not<br>separately<br>reported in CD<br>group<br>Difference vs HC | Supports<br>Vitamin K<br>deficiency<br>being present<br>in CD<br>remission | Supports<br>Vitamin K<br>status being<br>altered in Cd<br>remission in<br>comparison<br>with healthy<br>controls (HC) | Exploration of<br>cause<br>Subgroup analysis<br>or<br>Special tests                                                                                                                                                                                                   | Overall<br>Quality<br>(see<br>table 2) |
|------------------------------------------------------------|------|-----------------|-----|----------------------------------|----------------|----------------------------------------------------------------------------------------------------------------------------------------------------------------|--------------------------------------------------------------------------------------------------------------------------------|----------------------------------------------------------------------------|-----------------------------------------------------------------------------------------------------------------------|-----------------------------------------------------------------------------------------------------------------------------------------------------------------------------------------------------------------------------------------------------------------------|----------------------------------------|
| MacMaster<br>[20]                                          | 2021 | 59              |     | X                                |                | All in clinical<br>remission (HBI)<br>No separate CD<br><br>53% in biochem<br>remission (BCR)<br>(FCP < 250, CRP<br><10 alb >35)<br>(not report<br>separately) | 2% deficiency<br><br>0.2nmol/mmol<br>triglyceride                                                                              | No / low<br>prevalence                                                     | Yes low                                                                                                               | Relationship<br>between alb, FCP<br>and crp explored<br>with Spearman's<br>RHO- nil correlation.<br><br>No exploration of<br>phenotypic<br>predictors of<br>deficiency done.<br><br>Survival analysis of<br>flare in subsequent<br>12 months found no<br>relationship | Medium                                 |

### Thiamine (B1)

| Thiamine<br>Author<br>[main text<br>ref number] | Year | N CD<br>(HC) | P/R | Data on %<br>Deficiency<br>in CD | CD<br>vs<br>HC | Separate<br>reporting of<br>remission?<br>Definition of<br>remission<br>or Cohort<br>characteristics<br>(CCh)            | Prevalence of<br>Deficiency<br>In CD remission<br>group or if not<br>separately reported<br>in CD group<br>Difference vs HC | Supports<br>Thiamine<br>deficiency<br>being<br>present in<br>CD<br>remission | Supports<br>Thiamine<br>status being<br>altered in Cd<br>remission in<br>comparison<br>with healthy<br>controls (HC) | Exploration of<br>cause<br>Subgroup analysis<br>or<br>Special tests                                                                                                                                       | Overall<br>Quality<br>(see<br>table 2) |
|-------------------------------------------------|------|--------------|-----|----------------------------------|----------------|--------------------------------------------------------------------------------------------------------------------------|-----------------------------------------------------------------------------------------------------------------------------|------------------------------------------------------------------------------|----------------------------------------------------------------------------------------------------------------------|-----------------------------------------------------------------------------------------------------------------------------------------------------------------------------------------------------------|----------------------------------------|
| Geerling<br>[16]                                | 1998 | 32<br>(32)   |     | X                                | X              | No separate<br>remission group<br><br>(CCh):<br>Median CDAI 139,<br>53% remission<br>(CDAI <150)                         | 0% deficient<br>(<85nmol/L)<br><br>Mean (+/-SD) CD:<br>119+/-27.5nmol/L<br>Vs<br>HC: 114+/-26.4<br>NS                       | No                                                                           | No                                                                                                                   | Intake of<br>Thiamine<br>assessed with<br>FFQ:<br>Less than RDA in<br>34% CD and 41%<br>HC. Intake not<br>different<br>No reported<br>intake vs serum<br>analyses.<br>Nil analysis vs<br>disease activity | Medium                                 |
| Geerling<br>[18]                                | 2000 | 23<br>(69)   |     |                                  | X              | Remission not<br>reported separately<br>(CCh):<br>87% in remission<br>(CDAI <150)<br>Mean (+/-SD)<br>CDAI<br>96.9+/-66.5 | No prevalence<br>data.<br><br>Mean+/-SD in CD:<br>115+/-15.2nmol/L<br>Vs<br>Controls<br>109+/-277nmol/L<br>NS               | Not<br>reported                                                              | No                                                                                                                   | Intake of<br>Thiamine<br>assessed with FFQ<br>and diary<br>CD vs HC NS<br>No reported<br>intake vs serum<br>correlation<br>analyses.                                                                      | High                                   |

| Thiamine<br>Author<br>[main text<br>ref number] | Year | N CD<br>(HC) | P/R | Data on %<br>Deficiency<br>in CD | CD<br>vs<br>HC | Separate<br>reporting of<br>remission?<br>Definition of<br>remission<br>or Cohort<br>characteristics<br>(CCh) | Prevalence of<br>Deficiency<br>In CD remission<br>group or if not<br>separately reported<br>in CD group<br>Difference vs HC                                          | Supports<br>Thiamine<br>deficiency<br>being<br>present in<br>CD<br>remission | Supports<br>Thiamine<br>status being<br>altered in Cd<br>remission in<br>comparison<br>with healthy<br>controls (HC) | Exploration of<br>cause<br>Subgroup analysis<br>or<br>Special tests                                                                                                                                                                                                                                 | Overall<br>Quality<br>(see<br>table 2) |
|-------------------------------------------------|------|--------------|-----|----------------------------------|----------------|---------------------------------------------------------------------------------------------------------------|----------------------------------------------------------------------------------------------------------------------------------------------------------------------|------------------------------------------------------------------------------|----------------------------------------------------------------------------------------------------------------------|-----------------------------------------------------------------------------------------------------------------------------------------------------------------------------------------------------------------------------------------------------------------------------------------------------|----------------------------------------|
| Filippi [19]                                    | 2006 | 54           |     | X                                | X              | All in remission<br><br>CDAI<br>All subjects<br>needed<br>3/12 (CDAI <150)<br><br>Mean CRP<br>6.6-/-0.8mg/dl  | 32% defic<br>(no reference<br>ranges)<br>in graph only<br><br>Biochemical<br>analysis of HC not<br>reported (either as<br>prevalence of<br>deficiency or<br>results) | Yes                                                                          | Not<br>reported                                                                                                      | Mean Intake of<br>B1 assessed with<br>3-day food diary<br>in CD and<br>compared vs HC<br>in male and<br>female separately<br>Intake in CD f<br>(n=28) 1.23+/-<br>0.18mg/day less<br>than HC f (n=16)<br>1.78+/-0.38<br>P<0.05<br>CD m (n=26) vs<br>HC m (n=9) NS<br>All groups mean ><br>French RDA | Low                                    |

| <b>Thiamine</b><br>Author<br>[main text<br>ref number] | Year | N CD<br>(HC) | P/R | Data on %<br>Deficiency<br>in CD | CD<br>vs<br>HC | Separate<br>reporting of<br>remission?<br>Definition of<br>remission<br>or Cohort<br>characteristics<br>(CCh)                                                  | Prevalence of<br>Deficiency<br>In CD remission<br>group or if not<br>separately reported<br>in CD group<br>Difference vs HC | Supports<br>Thiamine<br>deficiency<br>being<br>present in<br>CD<br>remission | Supports<br>Thiamine<br>status being<br>altered in Cd<br>remission in<br>comparison<br>with healthy<br>controls (HC) | Exploration of<br>cause<br>Subgroup analysis<br>or<br>Special tests                                                                                                                                                                                                      | Overall<br>Quality<br>(see<br>table 2) |
|--------------------------------------------------------|------|--------------|-----|----------------------------------|----------------|----------------------------------------------------------------------------------------------------------------------------------------------------------------|-----------------------------------------------------------------------------------------------------------------------------|------------------------------------------------------------------------------|----------------------------------------------------------------------------------------------------------------------|--------------------------------------------------------------------------------------------------------------------------------------------------------------------------------------------------------------------------------------------------------------------------|----------------------------------------|
| MacMaster<br>[20]                                      | 2021 | 59           |     | X                                |                | All in clinical<br>remission (HBI)<br>No separate CD<br><br>53% in biochem<br>remission (BCR)<br>(FCP < 250, CRP<br><10 alb >35)<br>(not report<br>separately) | 0% deficiency<br><br>275ng/g Hb                                                                                             | No                                                                           | Not<br>reported                                                                                                      | Relationship<br>between alb, FCP<br>and crp explored<br>with Spearman's<br>RHO- nil<br>correlation.<br><br>No exploration of<br>phenotypic<br>predictors of<br>deficiency done.<br><br>Survival analysis of<br>flare in subsequent<br>12 months found<br>no relationship | Medium                                 |

### Riboflavin (B2)

| <b>Riboflavin (B2)</b><br>Author<br>[main text<br>ref<br>number] | Year | N<br>CD<br>(HC) | P/R | Data on %<br>Deficiency<br>in CD | CD<br>vs<br>HC | Separate<br>reporting of<br>remission?<br>Definition of<br>remission<br>or Cohort<br>characteristics<br>(CCh)                                                  | Prevalence of<br>Deficiency<br>In CD remission<br>group or if not<br>separately reported<br>in CD group<br>Difference vs HC | Supports B2<br>deficiency<br>being<br>present in<br>CD<br>remission | Supports B2<br>status being<br>altered in Cd<br>remission in<br>comparison<br>with healthy<br>controls (HC) | Exploration of<br>cause<br>Subgroup analysis<br>or<br>Special tests                                                                                                                                                                                                                                                                    | Overall<br>Quality<br>(see<br>table 2) |
|------------------------------------------------------------------|------|-----------------|-----|----------------------------------|----------------|----------------------------------------------------------------------------------------------------------------------------------------------------------------|-----------------------------------------------------------------------------------------------------------------------------|---------------------------------------------------------------------|-------------------------------------------------------------------------------------------------------------|----------------------------------------------------------------------------------------------------------------------------------------------------------------------------------------------------------------------------------------------------------------------------------------------------------------------------------------|----------------------------------------|
| MacMaster<br>[20]                                                | 2021 | 59              |     | X                                |                | All in clinical<br>remission (HBI)<br>No separate CD<br><br>53% in biochem<br>remission (BCR)<br>(FCP < 250, CRP<br><10 alb >35)<br>(not report<br>separately) | 2% deficient<br><1.0-3.4 nmol/g Hb                                                                                          | No / low<br>prevalence                                              | Not clear /<br>reported                                                                                     | Relationship<br>between alb, FCP<br>and crp explored<br>with Spearman's<br>RHO. Only Alb and<br>crp related<br>(rho=0.24 p 0.018,<br>rho 0.20 p0.054<br>respectively)<br>No exploration of<br>phenotypic<br>predictors of<br>deficiency done.<br><br>Survival analysis of<br>flare in subsequent<br>12 months found<br>no relationship | Medium                                 |

## Niacin (B3)

| <b>Niacin (B3)</b><br>[main text ref number] | Year | N CD (HC) | P/R | Data on % Deficiency in CD | CD vs HC | Separate reporting of remission? Definition of remission or Cohort characteristics (CCh)                  | Prevalence of Deficiency<br>In CD remission group or if not separately reported in CD group<br><br>Difference vs HC                   | Supports B3 deficiency being present in CD remission | Supports B3 status being altered in Cd remission in comparison with healthy controls (HC) | Exploration of cause<br>Subgroup analysis or<br>Special tests                                                                                                                                             | Overall Quality (see table 2) |
|----------------------------------------------|------|-----------|-----|----------------------------|----------|-----------------------------------------------------------------------------------------------------------|---------------------------------------------------------------------------------------------------------------------------------------|------------------------------------------------------|-------------------------------------------------------------------------------------------|-----------------------------------------------------------------------------------------------------------------------------------------------------------------------------------------------------------|-------------------------------|
| Filippi [19]                                 | 2006 | 54        |     | X                          | X        | All in remission<br><br>CDAI<br>All subjects needed<br>3/12 (CDAI <150)<br><br>Mean CRP<br>6.6-/-0.8mg/dl | 77% of CD low in Niacin (no ref range)<br><br>Biochemical analysis of HC not reported (either as prevalence of deficiency or results) | Yes                                                  | Not clear / reported                                                                      | Mean B3 intake assessed with 3-day food diary in CD and compared vs HC in male and female separately<br>Intake in CD f (n=28) vs HC f (n=16) and CD m (n=26) vs HC m (n=9) NS<br>All groups > French RDA. | Low                           |



### Pyridoxic Acid (B6)

| <b>Pyridoxic Acid (B6)</b><br>Author<br>[main text<br>ref<br>number] | Year | N<br>CD<br>(HC) | P/R | Data on %<br>Deficiency<br>in CD | CD<br>vs<br>HC | Separate<br>reporting of<br>remission?<br>Definition of<br>remission<br>or Cohort<br>characteristics<br>(CCh)   | Prevalence of<br>Deficiency<br>In CD remission group<br>or if not separately<br>reported in CD group<br>Difference vs HC                              | Supports<br>B6<br>deficiency<br>being<br>present in<br>CD<br>remission | Supports B6<br>status being<br>altered in Cd<br>remission in<br>comparison<br>with healthy<br>controls (HC) | Exploration of cause<br>Subgroup analysis or<br>Special tests                                                                                                                                                                                                                                        | Overall<br>Quality<br>(see<br>table 2) |
|----------------------------------------------------------------------|------|-----------------|-----|----------------------------------|----------------|-----------------------------------------------------------------------------------------------------------------|-------------------------------------------------------------------------------------------------------------------------------------------------------|------------------------------------------------------------------------|-------------------------------------------------------------------------------------------------------------|------------------------------------------------------------------------------------------------------------------------------------------------------------------------------------------------------------------------------------------------------------------------------------------------------|----------------------------------------|
| Filippi [19]                                                         | 2006 | 54              |     | X                                | X              | All in remission<br><br>CDAI<br>All subjects<br>needed<br>3/12 (CDAI<br><150)<br><br>Mean CRP<br>6.6-/-0.8mg/dl | 34%<br>(no reference ranges)<br>in graph only<br><br>Biochemical analysis of<br>HC not reported<br>(either as prevalence<br>of deficiency or results) | Yes                                                                    | Not clear /<br>reported                                                                                     | Mean Intake of B6<br>assessed with 3-day<br>food diary in CD and<br>compared vs HC in<br>male and female<br>separately<br>Intake in CD f (n=28)<br>1.04+/-0.7mg/day<br>less than HC f (n=16)<br>1.57+/-0.20 P<0.01<br>CD m (n=26) vs HC m<br>(n=9)<br>NS<br>CD F mean, CD M and<br>HC M < French RDA | Low                                    |

| <b>Pyridoxic Acid (B6)</b><br>Author<br>[main text<br>ref<br>number] | Year | N<br>CD<br>(HC) | P/R | Data on %<br>Deficiency<br>in CD | CD<br>vs<br>HC | Separate<br>reporting of<br>remission?<br>Definition of<br>remission<br>or Cohort<br>characteristics<br>(CCh) | Prevalence of<br>Deficiency<br>In CD remission group<br>or if not separately<br>reported in CD group<br>Difference vs HC | Supports<br>B6<br>deficiency<br>being<br>present in<br>CD<br>remission | Supports B6<br>status being<br>altered in Cd<br>remission in<br>comparison<br>with healthy<br>controls (HC) | Exploration of cause<br>Subgroup analysis or<br>Special tests                                                                                                                                                                                                                                                              | Overall<br>Quality<br>(see<br>table 2) |
|----------------------------------------------------------------------|------|-----------------|-----|----------------------------------|----------------|---------------------------------------------------------------------------------------------------------------|--------------------------------------------------------------------------------------------------------------------------|------------------------------------------------------------------------|-------------------------------------------------------------------------------------------------------------|----------------------------------------------------------------------------------------------------------------------------------------------------------------------------------------------------------------------------------------------------------------------------------------------------------------------------|----------------------------------------|
| Vagianos<br>[34]                                                     | 2007 | 84              |     | X                                |                | No separate<br>remission CD<br>group<br><br>CCh:<br>61% in<br>remission<br>(HBI<5)                            | 45.7%<br>(<5µg/L)                                                                                                        | Yes                                                                    | Not clear /<br>reported                                                                                     | Intake assessed with<br>FFQ then 4-day food<br>diary inc supplements<br>then compared vs<br>adequacy (defined as<br><66% dietary<br>reference value (DRV))<br>B6 intake inadequate<br>in 4.2% CD<br><br>Spearman Correlation<br>of B6 Intake / 100kcal<br>vs serum B6 very<br>strongly correlated <i>r</i><br>0.72 P<0.001 | Medium                                 |

| <b>Pyridoxic Acid (B6)</b><br>Author<br>[main text<br>ref<br>number] | Year | N<br>CD<br>(HC) | P/R | Data on %<br>Deficiency<br>in CD | CD<br>vs<br>HC | Separate<br>reporting of<br>remission?<br>Definition of<br>remission<br>or Cohort<br>characteristics<br>(CCh) | Prevalence of<br>Deficiency<br>In CD remission group<br>or if not separately<br>reported in CD group<br>Difference vs HC | Supports<br>B6<br>deficiency<br>being<br>present in<br>CD<br>remission | Supports B6<br>status being<br>altered in Cd<br>remission in<br>comparison<br>with healthy<br>controls (HC) | Exploration of cause<br>Subgroup analysis or<br>Special tests                                                                                                                                                                                                                                                                          | Overall<br>Quality<br>(see<br>table 2) |
|----------------------------------------------------------------------|------|-----------------|-----|----------------------------------|----------------|---------------------------------------------------------------------------------------------------------------|--------------------------------------------------------------------------------------------------------------------------|------------------------------------------------------------------------|-------------------------------------------------------------------------------------------------------------|----------------------------------------------------------------------------------------------------------------------------------------------------------------------------------------------------------------------------------------------------------------------------------------------------------------------------------------|----------------------------------------|
| Vagianos<br>[39]                                                     | 2012 | 70              | P   | X                                |                | No separate<br>remission CD<br>group<br><br>CCh:<br>62.9% in<br>remission<br>(HBI<5)<br>at every visit.       | 30% (<20nmol/L)                                                                                                          | Yes                                                                    | Not clear /<br>reported                                                                                     | Intake assessed with<br>FFQ then 3-day food<br>diary inc. supplements<br>(57.1% on<br>supplement)<br><br>Pearson Correlation of<br>B6 Intake vs serum B6<br>strongly correlated<br><i>r</i> 0.41 <i>P</i> <0.001<br><br>59% of B6 deficient<br>subjects had previous<br>bowel surgery vs 13%<br>without. B6 not<br>correlated with HcY | High                                   |

| <b>Pyridoxic Acid (B6)</b><br>Author<br>[main text<br>ref<br>number] | Year | N<br>CD<br>(HC) | P/R | Data on %<br>Deficiency<br>in CD | CD<br>vs<br>HC | Separate<br>reporting of<br>remission?<br>Definition of<br>remission<br>or Cohort<br>characteristics<br>(CCh)                          | Prevalence of<br>Deficiency<br>In CD remission group<br>or if not separately<br>reported in CD group<br>Difference vs HC | Supports<br>B6<br>deficiency<br>being<br>present in<br>CD<br>remission | Supports B6<br>status being<br>altered in Cd<br>remission in<br>comparison<br>with healthy<br>controls (HC) | Exploration of cause<br>Subgroup analysis or<br>Special tests                                                                                                                                                                                                                                                                                                  | Overall<br>Quality<br>(see<br>table 2) |
|----------------------------------------------------------------------|------|-----------------|-----|----------------------------------|----------------|----------------------------------------------------------------------------------------------------------------------------------------|--------------------------------------------------------------------------------------------------------------------------|------------------------------------------------------------------------|-------------------------------------------------------------------------------------------------------------|----------------------------------------------------------------------------------------------------------------------------------------------------------------------------------------------------------------------------------------------------------------------------------------------------------------------------------------------------------------|----------------------------------------|
| MacMaster<br>[20]                                                    | 2021 | 59              | P   | X                                |                | All in clinical<br>remission<br><br>53% in biochem<br>remission (BCR)<br>(FCP < 250, CRP<br><10 Alb >35)<br>(not report<br>separately) | 10%<br>250 pmol/g Hb                                                                                                     | Yes                                                                    | Yes                                                                                                         | Relationship between<br>Alb, FCP and crp<br>explored with<br>Spearman's RHO- nil<br>correlation.<br><br>Exploration of<br>phenotypic predictors of<br>deficiency found B6<br>deficiency to be more<br>common in structuring<br>than inflammatory<br>phenotype P=0.001<br><br>Survival analysis of flare<br>in subsequent 12<br>months found no<br>relationship | Medium                                 |

### Folate (B9)

| <b>Folate (B9)</b><br>Author<br>[main text<br>ref number] | Year | N CD<br>(HC) | P/R | Data<br>on %<br>Defici<br>ency<br>in CD | CD<br>vs<br>HC | Separate<br>reporting of<br>remission?<br>Definition of<br>remission<br>or Cohort<br>characteristics<br>(CCh)                  | Prevalence of<br>Deficiency<br>In CD remission<br>group or if not<br>separately<br>reported in CD<br>group<br><br>Difference vs HC | Supports<br>Folate<br>deficiency<br>being<br>present in<br>CD<br>remission | Supports<br>Folate status<br>being altered<br>in Cd<br>remission in<br>comparison<br>with healthy<br>controls (HC) | Exploration of cause<br>Subgroup analysis or<br>Special tests | Overall<br>Quality (see<br>table 2) |
|-----------------------------------------------------------|------|--------------|-----|-----------------------------------------|----------------|--------------------------------------------------------------------------------------------------------------------------------|------------------------------------------------------------------------------------------------------------------------------------|----------------------------------------------------------------------------|--------------------------------------------------------------------------------------------------------------------|---------------------------------------------------------------|-------------------------------------|
| Imes<br>[23]                                              | 1987 | 137          | P   | X                                       |                | Remission not<br>reported<br>separately<br><br>CCr:<br>70% in remission<br>(CDAI <150)                                         | 10% (no<br>reference range)                                                                                                        | Yes                                                                        | Not clear /<br>reported                                                                                            | nil                                                           | Low                                 |
| Geerling<br>[16]                                          | 1998 | 32           | P   | X                                       |                | No separate<br>remission group<br><br>(CCh):<br>Median CDAI<br>139,<br>53% remission<br>(CDAI <150)                            | No reporting of<br>prevalence of<br>deficiency<br>Mean +/-SD<br>CD: 14.4+/-13.4<br>vs<br>HC: 13.4+/-5.88<br>NS                     | Not clear /<br>reported                                                    | No                                                                                                                 | Intake not among<br>micronutrients<br>assessed                | Medium                              |
| Geerling<br>[18]                                          | 2000 | 23           | P   |                                         | X              | Remission not<br>reported<br>separately<br>(CCh):<br>87% in<br>remission (CDAI<br><150)<br>Mean (+/-SD)<br>CDAI<br>96.9+/-66.5 | No reporting of<br>prevalence of<br>deficiency<br><br>Mean +/-SD<br>CD:10.7+/-9.1<br>Vs<br>HC: 12.4+/-5.6<br>NS                    | Not clear /<br>reported                                                    | No                                                                                                                 | Intake not among<br>micronutrients<br>assessed                | Medium                              |

| <b>Folate (B9)</b><br>Author<br>[main text<br>ref number] | Year | N CD<br>(HC) | P/R | Data<br>on %<br>Defici<br>ency<br>in CD | CD<br>vs<br>HC | Separate<br>reporting of<br>remission?<br>Definition of<br>remission<br>or Cohort<br>characteristics<br>(CCh)                  | Prevalence of<br>Deficiency<br>In CD remission<br>group or if not<br>separately<br>reported in CD<br>group<br><br>Difference vs HC                             | Supports<br>Folate<br>deficiency<br>being<br>present in<br>CD<br>remission | Supports<br>Folate status<br>being altered<br>in Cd<br>remission in<br>comparison<br>with healthy<br>controls (HC) | Exploration of cause<br>Subgroup analysis or<br>Special tests                                                                                                                                                                              | Overall<br>Quality (see<br>table 2) |
|-----------------------------------------------------------|------|--------------|-----|-----------------------------------------|----------------|--------------------------------------------------------------------------------------------------------------------------------|----------------------------------------------------------------------------------------------------------------------------------------------------------------|----------------------------------------------------------------------------|--------------------------------------------------------------------------------------------------------------------|--------------------------------------------------------------------------------------------------------------------------------------------------------------------------------------------------------------------------------------------|-------------------------------------|
| Koutrobakis<br>[25]                                       | 2000 | 55<br>(74)   | ?   |                                         | X              | No separate<br>remission<br>group.<br><br>CCh: 69% in<br>remission<br>(CDAI<150)                                               | Mean +/-SD<br>CD: 6.34+/-<br>3.05ng/ml<br>vs<br>HC: 8.78<br>+/-3.07ng/ml<br><i>P</i> <0.05                                                                     | Not clear /<br>reported                                                    | Yes                                                                                                                | Negatively correlated<br>with homocysteine<br>folate levels<br>( <i>r</i> =-0.493,<br><i>P</i> < 0.01)                                                                                                                                     | Low                                 |
| Filippi<br>[19]                                           | 2006 | 54           |     |                                         | X              | All in remission<br><br>CDAI<br>All subjects<br>needed<br>3/12 (CDAI<br><150)<br><br>Mean CRP<br>6.6-/-0.8mg/dl<br>(~63nmol/L) | 20-25% (no<br>reference ranges)<br>in graph only<br><br>Biochemical<br>analysis of HC not<br>reported (either<br>as prevalence of<br>deficiency or<br>results) | Yes                                                                        | Not clear /<br>reported                                                                                            | Mean B9 intake<br>assessed with 3-day<br>food diary in CD and<br>compared vs HC in<br>male and female<br>separately<br>Intake in CD f (n=28) vs<br>HC f (n=16) and CD m<br>(n=26) vs HC m (n=9)<br><i>NS</i><br>All groups >French<br>RDA. | Low                                 |

| <b>Folate (B9)</b><br>Author<br>[main text<br>ref number] | Year | N CD<br>(HC) | P/R | Data<br>on %<br>Defici<br>ency<br>in CD | CD<br>vs<br>HC | Separate<br>reporting of<br>remission?<br>Definition of<br>remission<br>or Cohort<br>characteristics<br>(CCh) | Prevalence of<br>Deficiency<br>In CD remission<br>group or if not<br>separately<br>reported in CD<br>group<br><br>Difference vs HC | Supports<br>Folate<br>deficiency<br>being<br>present in<br>CD<br>remission | Supports<br>Folate status<br>being altered<br>in Cd<br>remission in<br>comparison<br>with healthy<br>controls (HC) | Exploration of cause<br>Subgroup analysis or<br>Special tests                                                                                                                                                                                                                                                  | Overall<br>Quality (see<br>table 2) |
|-----------------------------------------------------------|------|--------------|-----|-----------------------------------------|----------------|---------------------------------------------------------------------------------------------------------------|------------------------------------------------------------------------------------------------------------------------------------|----------------------------------------------------------------------------|--------------------------------------------------------------------------------------------------------------------|----------------------------------------------------------------------------------------------------------------------------------------------------------------------------------------------------------------------------------------------------------------------------------------------------------------|-------------------------------------|
| Roblin<br>[33]                                            | 2007 | 92           | P   | X                                       |                | No separate<br>remission<br>group.<br><br>Cohort<br>characteristics<br>38/55 (69%) in<br>CDAI remission       | 35%<br>(RBC folate<br><210nmol/L)<br><br>No HC<br>comparators                                                                      | Yes                                                                        | Not clear /<br>reported                                                                                            | Primary aim of study<br>was exploration of<br>Hyperhomocysteinaem<br>ia (HHcy) against BMD.<br><br>Low level folate assoc<br>with HHcy and low<br>BMD                                                                                                                                                          | Medium                              |
| Vagianos<br>[34]                                          | 2007 | 84           |     | X                                       |                | No separate<br>remission CD<br>group<br><br>CCh:<br>61% in<br>remission<br>(HBI<5)                            | 0%<br><br>(Red blood cell<br>folate <320µg/L)                                                                                      | No                                                                         | Not clear /<br>reported                                                                                            | Intake assessed with<br>FFQ then 4-day food<br>diary inc supplements<br>then compared vs<br>adequacy (defined as<br><66% dietary reference<br>value (DRV))<br>B9 intake inadequate<br>in 20% CD Spearman<br>Correlation of B9<br>Intake / 100kcal vs<br>serum B9 strongly<br>correlated $r$ 0.57<br>$P<0.0001$ | Medium                              |
| Valentini<br>[35]                                         | 2008 | 94           | P   | X                                       | X              | All in remission<br>(CDAI <150)                                                                               | 0% (<2.8µg/L)<br><br>Conc vs sex<br>matched HC NS                                                                                  | No                                                                         | No                                                                                                                 | nil                                                                                                                                                                                                                                                                                                            | High                                |

| <b>Folate (B9)</b><br>Author<br>[main text<br>ref number] | Year | N CD<br>(HC) | P/R | Data<br>on %<br>Defici<br>ency<br>in CD | CD<br>vs<br>HC | Separate<br>reporting of<br>remission?<br>Definition of<br>remission<br>or Cohort<br>characteristics<br>(CCh) | Prevalence of<br>Deficiency<br>In CD remission<br>group or if not<br>separately<br>reported in CD<br>group<br><br>Difference vs HC | Supports<br>Folate<br>deficiency<br>being<br>present in<br>CD<br>remission | Supports<br>Folate status<br>being altered<br>in Cd<br>remission in<br>comparison<br>with healthy<br>controls (HC) | Exploration of cause<br>Subgroup analysis or<br>Special tests                                                                                                                                                                               | Overall<br>Quality (see<br>table 2) |
|-----------------------------------------------------------|------|--------------|-----|-----------------------------------------|----------------|---------------------------------------------------------------------------------------------------------------|------------------------------------------------------------------------------------------------------------------------------------|----------------------------------------------------------------------------|--------------------------------------------------------------------------------------------------------------------|---------------------------------------------------------------------------------------------------------------------------------------------------------------------------------------------------------------------------------------------|-------------------------------------|
| Kallel [36]                                               | 2011 | 89<br>(103)  | P   |                                         | X              | Remission CD<br>not reported<br>separately<br><br>CCh: 71.9% in<br>remission<br>(CDAI<150)                    | Mean +/-SD<br>CD: 8.54+/-3.04<br>vs<br>HC: 8.10+/-3.11<br>NS                                                                       | Not<br>reported                                                            | No                                                                                                                 | In CD cases Vit B9 was<br>identified as having a<br>weak correlation with<br>Homocysteine (HcY)<br><br><i>R</i> =-0.22 <i>P</i> =0.03                                                                                                       | High                                |
| Vagianos<br>[39]                                          | 2012 | 70           | P   | X                                       |                | No separate<br>remission CD<br>group<br><br>CCh:<br>62.9% in<br>remission<br>(HBI<5)<br>at every visit.       | 1.4%<br>(<11.8nmol/L)<br><br>((64.3% on<br>supplements))                                                                           | No / low<br>prevalence                                                     | Not clear /<br>reported                                                                                            | Intake assessed with<br>FFQ then 3-day food<br>diary inc supplements<br>(64.3% on supplement)<br><br>Pearson Correlation of<br>B9 Intake vs serum<br>weakly correlated<br><i>r</i> 0.26 <i>P</i> 0.008<br><br>B9 not correlated with<br>HcY | High                                |



| <b>Folate (B9)</b><br>Author<br>[main text<br>ref number] | Year | N CD<br>(HC) | P/R | Data<br>on %<br>Defici<br>ency<br>in CD | CD<br>vs<br>HC | Separate<br>reporting of<br>remission?<br>Definition of<br>remission<br>or Cohort<br>characteristics<br>(CCh) | Prevalence of<br>Deficiency<br>In CD remission<br>group or if not<br>separately<br>reported in CD<br>group<br><br>Difference vs HC | Supports<br>Folate<br>deficiency<br>being<br>present in<br>CD<br>remission | Supports<br>Folate status<br>being altered<br>in Cd<br>remission in<br>comparison<br>with healthy<br>controls (HC) | Exploration of cause<br>Subgroup analysis or<br>Special tests                                                                                                                                                                                | Overall<br>Quality (see<br>table 2) |
|-----------------------------------------------------------|------|--------------|-----|-----------------------------------------|----------------|---------------------------------------------------------------------------------------------------------------|------------------------------------------------------------------------------------------------------------------------------------|----------------------------------------------------------------------------|--------------------------------------------------------------------------------------------------------------------|----------------------------------------------------------------------------------------------------------------------------------------------------------------------------------------------------------------------------------------------|-------------------------------------|
| Bermejo<br>[40]                                           | 2013 | 180          | P   | X                                       |                | 62% in<br>remission<br>(HBI<5)                                                                                | 22.2%<br>(<3ng/ml)                                                                                                                 | Yes                                                                        | Not reported                                                                                                       | multivariate analysis of<br>potential risk factors<br>identified HBI>2 as a<br>risk factor (OR 2.4 (1.2-<br>5.1) <i>P</i> 0.01), whereas<br>CRP<10, ESR>20,<br>anaemia, age, sex,<br>disease location and<br>ileal resections not<br>related | Medium                              |
| Lupu [45]                                                 | 2015 | 113          | P   | X                                       |                | Remission not<br>reported<br>separately<br><br>CCh:<br>62% remission<br>(HBI<5)                               | 5.2%<br>(<4.6ng/ml)                                                                                                                | Yes                                                                        | Not reported                                                                                                       | nil                                                                                                                                                                                                                                          | Low                                 |

| <b>Folate (B9)</b><br>Author<br>[main text<br>ref number] | Year | N CD<br>(HC) | P/R | Data<br>on %<br>Defici<br>ency<br>in CD | CD<br>vs<br>HC | Separate<br>reporting of<br>remission?<br>Definition of<br>remission<br>or Cohort<br>characteristics<br>(CCh)                                                                                           | Prevalence of<br>Deficiency<br>In CD remission<br>group or if not<br>separately<br>reported in CD<br>group<br><br>Difference vs HC | Supports<br>Folate<br>deficiency<br>being<br>present in<br>CD<br>remission | Supports<br>Folate status<br>being altered<br>in Cd<br>remission in<br>comparison<br>with healthy<br>controls (HC) | Exploration of cause<br>Subgroup analysis or<br>Special tests                                                                          | Overall<br>Quality (see<br>table 2) |
|-----------------------------------------------------------|------|--------------|-----|-----------------------------------------|----------------|---------------------------------------------------------------------------------------------------------------------------------------------------------------------------------------------------------|------------------------------------------------------------------------------------------------------------------------------------|----------------------------------------------------------------------------|--------------------------------------------------------------------------------------------------------------------|----------------------------------------------------------------------------------------------------------------------------------------|-------------------------------------|
| De Castro<br>[53]                                         | 2019 | 31           | P   | X                                       |                | Yes. Remission<br>defined with<br>endoscopy (<5,<br>no deep ulcers<br>or) or MRI with<br>none or<br>creeping fat,<br>deep ulcers or<br>oedema.<br><br>Mean (SD) CDAI<br>of this group<br>41.35(+/-41.2) | 0%<br>(3.9ng/mL)                                                                                                                   | No                                                                         | Not reported                                                                                                       | Folate lower in those<br>with endoscopic or<br>MRI activity<br>9.82(+/-3.8) vs 12.7<br>(+/-4.09) <i>P</i> 0.0012<br>than those without | Medium                              |
| Marcil<br>[54]                                            | 2019 | 274          | P   | X                                       |                | Remission not<br>reported<br>separately<br><br>Cohort<br>characteristics:<br>58% remission<br>(HBI<5)                                                                                                   | 3.3%<br>(<7nmol/ml) or<br>(<317nmol/L RBC)                                                                                         | No (low<br>prevalence)                                                     | Not reported                                                                                                       | nil                                                                                                                                    | Low                                 |

| <b>Folate (B9)</b><br>Author<br>[main text<br>ref number] | Year | N CD<br>(HC) | P/R | Data<br>on %<br>Defici<br>ency<br>in CD | CD<br>vs<br>HC | Separate<br>reporting of<br>remission?<br>Definition of<br>remission<br>or Cohort<br>characteristics<br>(CCh)                          | Prevalence of<br>Deficiency<br>In CD remission<br>group or if not<br>separately<br>reported in CD<br>group<br><br>Difference vs HC | Supports<br>Folate<br>deficiency<br>being<br>present in<br>CD<br>remission | Supports<br>Folate status<br>being altered<br>in Cd<br>remission in<br>comparison<br>with healthy<br>controls (HC) | Exploration of cause<br>Subgroup analysis or<br>Special tests                                                                                                                                                                                                                                               | Overall<br>Quality (see<br>table 2) |
|-----------------------------------------------------------|------|--------------|-----|-----------------------------------------|----------------|----------------------------------------------------------------------------------------------------------------------------------------|------------------------------------------------------------------------------------------------------------------------------------|----------------------------------------------------------------------------|--------------------------------------------------------------------------------------------------------------------|-------------------------------------------------------------------------------------------------------------------------------------------------------------------------------------------------------------------------------------------------------------------------------------------------------------|-------------------------------------|
| MacMaster<br>[20]                                         | 2021 | 59           | P   | X                                       |                | All in clinical<br>remission<br><br>53% in biochem<br>remission (BCR)<br>(FCP < 250, CRP<br><10 alb >35)<br>(not report<br>separately) | 9%<br><br>(3ng/mL)                                                                                                                 | Yes                                                                        | Not clear /<br>reported                                                                                            | Relationship between alb,<br>FCP and crp explored<br>with Spearman's RHO- nil<br>correlation.<br><br>Exploration of phenotypic<br>predictors of deficiency<br>including supplements<br>(n=7) found no<br>associations<br><br>Survival analysis of flare<br>in subsequent 12 months<br>found no relationship | Medium                              |

### Cobalamin (B12)

| <b>Cobalamin (B12)</b><br>Author<br>[main text<br>ref number] | Year | N CD<br>(HC) | P/R | Data on %<br>Deficiency<br>in CD | CD<br>vs<br>HC | Separate<br>reporting of<br>remission?<br>Definition of<br>remission<br>or Cohort<br>characteristics<br>(CCh) | Prevalence of<br>Deficiency<br>In CD remission<br>group or if not<br>separately reported<br>in CD group<br>Difference vs HC | Supports<br>B12<br>deficiency<br>being<br>present in<br>CD<br>remission | Supports<br>B12 status<br>being<br>altered in Cd<br>remission in<br>comparison<br>with healthy<br>controls<br>(HC) | Exploration of cause<br>Subgroup analysis or<br>Special tests | Overall<br>Quality (see<br>table 2) |
|---------------------------------------------------------------|------|--------------|-----|----------------------------------|----------------|---------------------------------------------------------------------------------------------------------------|-----------------------------------------------------------------------------------------------------------------------------|-------------------------------------------------------------------------|--------------------------------------------------------------------------------------------------------------------|---------------------------------------------------------------|-------------------------------------|
| Imes<br>[23]                                                  | 1987 | 137          | P   | X                                |                | Remission not<br>reported<br>separately<br><br>CCr:<br>70% in<br>remission (CDAI<br><150)                     | 4% (no reference<br>range)                                                                                                  | Yes                                                                     | Not clear /<br>reported                                                                                            | nil                                                           | Low                                 |
| Geerling<br>[16]                                              | 1998 | 32           | P   |                                  | X              | No separate<br>remission<br>group<br><br>(CCh):<br>Median CDAI<br>139,<br>53% remission<br>(CDAI <150)        | Mean +/-SD<br>CD: 403+/-282<br>Vs<br>HC: 263+/-91.5<br>NS                                                                   | Not clear<br>/<br>reported                                              | No                                                                                                                 | Intake not among<br>micronutrients assessed                   | Medium                              |

| <b>Cobalamin (B12)</b><br>Author<br>[main text<br>ref number] | Year | N CD<br>(HC) | P/R | Data on %<br>Deficiency<br>in CD | CD<br>vs<br>HC | Separate<br>reporting of<br>remission?<br>Definition of<br>remission<br>or Cohort<br>characteristics<br>(CCh)                  | Prevalence of<br>Deficiency<br>In CD remission<br>group or if not<br>separately reported<br>in CD group<br>Difference vs HC | Supports<br>B12<br>deficiency<br>being<br>present in<br>CD<br>remission | Supports<br>B12 status<br>being<br>altered in Cd<br>remission in<br>comparison<br>with healthy<br>controls<br>(HC) | Exploration of cause<br>Subgroup analysis or<br>Special tests                                       | Overall<br>Quality (see<br>table 2) |
|---------------------------------------------------------------|------|--------------|-----|----------------------------------|----------------|--------------------------------------------------------------------------------------------------------------------------------|-----------------------------------------------------------------------------------------------------------------------------|-------------------------------------------------------------------------|--------------------------------------------------------------------------------------------------------------------|-----------------------------------------------------------------------------------------------------|-------------------------------------|
| Geerling<br>[18]                                              | 2000 | 23           | P   |                                  | X              | Remission not<br>reported<br>separately<br>(CCh):<br>87% in<br>remission<br>(CDAI <150)<br>Mean (+/-SD)<br>CDAI<br>96.9+/-66.5 | Mean +/-SD<br>CD: 225+/-60.7<br>Vs<br>HC: 270+/-88.2<br><i>P</i> <0.05                                                      | Not clear<br>/<br>reported                                              | Yes                                                                                                                | Intake not among<br>micronutrients assessed                                                         | Medium                              |
| Koutrobakis<br>[25]                                           | 2000 | 55           | ?   |                                  | X              | No separate<br>remission<br>group.<br><br>CCh: 69% in<br>remission<br>(CDAI<150)                                               | Mean +/-SD (pg/ml)<br>CD: 666.5+/-366.8<br>vs<br>HC: 377.5+/-155.6<br><i>P</i> <0.05                                        | Not<br>reported                                                         | No, it shows<br>that B12<br>higher in CD<br>than HC                                                                | Not correlated with<br>Homocysteine                                                                 | Low                                 |
| Tajika [30]                                                   | 2004 | 33<br>(15)   |     |                                  | X              | No separate<br>reporting of<br>remission.<br>CCh: Mean<br>CDAI<br>84.1 +/-44.2<br>(range, 12.6–<br>182.7)                      | Mean (SD) B12 CD:<br>479.1+/-302.7 vs HC<br>486.0 +/-90.1<br><i>NS</i>                                                      | Not<br>reported                                                         | No                                                                                                                 | Nil relationship to 25 OD<br>in correlation (study was<br>primarily reported as a<br>25 OH D paper) | High                                |

| <b>Cobalamin (B12)</b><br>Author<br>[main text<br>ref number] | Year | N CD<br>(HC) | P/R | Data on %<br>Deficiency<br>in CD | CD<br>vs<br>HC | Separate<br>reporting of<br>remission?<br>Definition of<br>remission<br>or Cohort<br>characteristics<br>(CCh)                                                           | Prevalence of<br>Deficiency<br>In CD remission<br>group or if not<br>separately reported<br>in CD group<br>Difference vs HC                                 | Supports<br>B12<br>deficiency<br>being<br>present in<br>CD<br>remission | Supports<br>B12 status<br>being<br>altered in Cd<br>remission in<br>comparison<br>with healthy<br>controls<br>(HC) | Exploration of cause<br>Subgroup analysis or<br>Special tests                                                                                                                                                                       | Overall<br>Quality (see<br>table 2) |
|---------------------------------------------------------------|------|--------------|-----|----------------------------------|----------------|-------------------------------------------------------------------------------------------------------------------------------------------------------------------------|-------------------------------------------------------------------------------------------------------------------------------------------------------------|-------------------------------------------------------------------------|--------------------------------------------------------------------------------------------------------------------|-------------------------------------------------------------------------------------------------------------------------------------------------------------------------------------------------------------------------------------|-------------------------------------|
| Filippi [19]                                                  | 2006 | 54           |     | X                                | X              | All in<br>remission<br>(CDAI <150)<br>All in<br>remission<br><br>CDAI<br>All subjects<br>needed<br>3/12 (CDAI<br><150)<br><br>Mean CRP<br>6.6-/-0.8mg/dl<br>(~63nmol/L) | 30-35%<br>(no reference<br>ranges)<br>Graph only<br><br>Biochemical analysis<br>of HC not reported<br>(either as<br>prevalence of<br>deficiency or results) | Yes                                                                     | Not clear /<br>reported                                                                                            | Mean B12 intake<br>assessed with 3-day<br>food diary in CD and<br>compared vs HC in male<br>and female separately<br><br>Intake in CD f (n=28) vs<br>HC f (n=16) and CD m<br>(n=26) vs HC m (n=9)<br>NS<br>All groups > French RDA. | Low                                 |
| Roblin [33]                                                   | 2007 | 92           | P   | X                                |                | No separate<br>remission<br>group.<br><br>Cohort<br>characteristics<br>38/55 (69%) in<br>CDAI<br>remission                                                              | 23%<br>(<145pmol/L)<br><br>No HC comparators                                                                                                                | Yes                                                                     | Not clear /<br>reported                                                                                            | Primary aim of study<br>was exploration of<br>Hyperhomocysteinaemia<br>(HHcy) against BMD.<br><br>Low level B12 not assoc<br>with HHcy                                                                                              | Medium                              |

| <b>Cobalamin (B12)</b><br>Author<br>[main text<br>ref number] | Year | N CD<br>(HC) | P/R | Data on %<br>Deficiency<br>in CD | CD<br>vs<br>HC | Separate<br>reporting of<br>remission?<br>Definition of<br>remission<br>or Cohort<br>characteristics<br>(CCh) | Prevalence of<br>Deficiency<br>In CD remission<br>group or if not<br>separately reported<br>in CD group<br>Difference vs HC | Supports<br>B12<br>deficiency<br>being<br>present in<br>CD<br>remission | Supports<br>B12 status<br>being<br>altered in Cd<br>remission in<br>comparison<br>with healthy<br>controls<br>(HC) | Exploration of cause<br>Subgroup analysis or<br>Special tests                                                                                                                                                                                                                                                         | Overall<br>Quality (see<br>table 2) |
|---------------------------------------------------------------|------|--------------|-----|----------------------------------|----------------|---------------------------------------------------------------------------------------------------------------|-----------------------------------------------------------------------------------------------------------------------------|-------------------------------------------------------------------------|--------------------------------------------------------------------------------------------------------------------|-----------------------------------------------------------------------------------------------------------------------------------------------------------------------------------------------------------------------------------------------------------------------------------------------------------------------|-------------------------------------|
| Vagianos<br>[34]                                              | 2007 | 84           |     | X                                |                | No separate<br>remission CD<br>group<br><br>CCh:<br>61% in<br>remission<br>(HBI<5)                            | 24.1%<br><br>(<179pmol/L)                                                                                                   | No                                                                      | Not clear /<br>reported                                                                                            | Intake assessed with<br>FFQ then 4-day food<br>diary inc. supplements<br>then compared vs<br>adequacy (defined as<br><66% dietary reference<br>value (DRV))<br>B12 intake inadequate in<br>5.6% CD Spearman<br>Correlation of B12<br>Intake / 100kcal vs<br>serum B12 moderately<br>correlated $r$ 0.45 $P$<br>0.0001 | Medium                              |
| Valentini<br>[35]                                             | 2008 | 94           | P   | X                                | X              | All in<br>remission<br>(CDAI <150)                                                                            | 9.6% (<199ng/L)<br><br>Conc vs sex matched<br>HC NS                                                                         | Yes                                                                     | No                                                                                                                 | nil                                                                                                                                                                                                                                                                                                                   | High                                |
| Kallel [36]                                                   | 2011 | 89           | P   |                                  | X              | Remission CD<br>not reported<br>separately<br><br>CCh: 71.9% in<br>remission<br>(CDAI<150)                    | Mean +/-SD<br>CD: 295+/-160 ng/l<br>Vs<br>HC:378+/-170 ng/l<br>$P$ <0.001                                                   | Not<br>reported                                                         | Yes                                                                                                                | In CD cases Vit B12 was<br>identified as having a<br>strong negative<br>correlation with<br>Homocysteine (HcY)<br><br>$R=-0.43$ $P$ <0.001                                                                                                                                                                            | High                                |

| <b>Cobalamin (B12)</b><br>Author<br>[main text<br>ref number] | Year | N CD<br>(HC) | P/R | Data on %<br>Deficiency<br>in CD | CD<br>vs<br>HC | Separate<br>reporting of<br>remission?<br>Definition of<br>remission<br>or Cohort<br>characteristics<br>(CCh) | Prevalence of<br>Deficiency<br>In CD remission<br>group or if not<br>separately reported<br>in CD group<br>Difference vs HC | Supports<br>B12<br>deficiency<br>being<br>present in<br>CD<br>remission | Supports<br>B12 status<br>being<br>altered in Cd<br>remission in<br>comparison<br>with healthy<br>controls<br>(HC) | Exploration of cause<br>Subgroup analysis or<br>Special tests                                                                                                                                                                                                                                                           | Overall<br>Quality (see<br>table 2) |
|---------------------------------------------------------------|------|--------------|-----|----------------------------------|----------------|---------------------------------------------------------------------------------------------------------------|-----------------------------------------------------------------------------------------------------------------------------|-------------------------------------------------------------------------|--------------------------------------------------------------------------------------------------------------------|-------------------------------------------------------------------------------------------------------------------------------------------------------------------------------------------------------------------------------------------------------------------------------------------------------------------------|-------------------------------------|
| Vagianos<br>[39]                                              | 2012 | 70           | P   | X                                |                | No separate<br>remission CD<br>group<br><br>CCh:<br>62.9% in<br>remission<br>(HBI<5)<br>at every visit.       | 11.4%<br>(<180pmol/L)                                                                                                       | Yes                                                                     | Not clear /<br>reported                                                                                            | Intake assessed with<br>FFQ then 3-day food<br>diary inc supplements<br>(47.1% on oral<br>supplement, 4.3% on<br>IM)<br><br>Pearson Correlation of<br>B12 Intake vs serum<br>strongly correlated<br><i>r</i> 0.42 <i>P</i> <0.001<br><br>B12 weakly negatively<br>correlated with HcY<br><i>r</i> -0.241 <i>P</i> 0.008 | High                                |
| Bermejo<br>[40]                                               | 2013 | 180          | P   | X                                |                | 62% in<br>remission<br>(HBI<5)                                                                                | 15.6%<br>(<200 pg/ml)                                                                                                       | Yes                                                                     | Not<br>reported                                                                                                    | multivariate analysis of<br>potential risk factors<br>only identified ileal<br>resection as a risk factor<br>(OR 2.7 (1.2-6.7) <i>P</i> 0.02),<br>whereas<br>CRP<10, ESR>20,<br>anaemia, age, sex,<br>disease location and<br>HBI>2 not related                                                                         | Medium                              |



| <b>Cobalamin (B12)</b><br>Author<br>[main text<br>ref number] | Year | N CD<br>(HC) | P/R | Data on %<br>Deficiency<br>in CD | CD<br>vs<br>HC | Separate<br>reporting of<br>remission?<br>Definition of<br>remission<br>or Cohort<br>characteristics<br>(CCh) | Prevalence of<br>Deficiency<br>In CD remission<br>group or if not<br>separately reported<br>in CD group<br>Difference vs HC                                          | Supports<br>B12<br>deficiency<br>being<br>present in<br>CD<br>remission | Supports<br>B12 status<br>being<br>altered in Cd<br>remission in<br>comparison<br>with healthy<br>controls<br>(HC) | Exploration of cause<br>Subgroup analysis or<br>Special tests                                                                                                                                                                                                                                  | Overall<br>Quality (see<br>table 2) |
|---------------------------------------------------------------|------|--------------|-----|----------------------------------|----------------|---------------------------------------------------------------------------------------------------------------|----------------------------------------------------------------------------------------------------------------------------------------------------------------------|-------------------------------------------------------------------------|--------------------------------------------------------------------------------------------------------------------|------------------------------------------------------------------------------------------------------------------------------------------------------------------------------------------------------------------------------------------------------------------------------------------------|-------------------------------------|
| Lupu [45]                                                     | 2015 | 115          | P   | X                                |                | Remission not<br>reported<br>separately<br><br>CCh:<br>CDAI Median<br>(IQR):<br>96 (51-145)                   | 13.0%<br>( $<191\text{pg/ml}$ )                                                                                                                                      | Yes                                                                     | Not clear /<br>reported                                                                                            | Nil                                                                                                                                                                                                                                                                                            | Low                                 |
| Ward [47]                                                     | 2015 | 381          | R   | X                                |                | Remission<br>group<br>reported<br>separately<br>(HBI $<5$ )                                                   | 33% deficient<br><br>(Holotranscobalamin<br>$<25\text{nmol}$ , or 25-<br>50nmol/L with<br>Methylmalonic $>280$<br>nM/L, comparative<br>low B12 $<147\text{pmol/l}$ ) | Yes                                                                     | Not<br>reported                                                                                                    | Univariate analysis of<br>risk factors for B12<br>deficiency identified:<br>Resection $<20\text{cm}$ :<br>OR 3.0 (95% CI 1.5-6.0)<br>$P$ 0.002<br>Resection $>20\text{cm}$ :<br>OR 6.7 (95% 3.0-14.7)<br>$P$ 0.0001<br>TI inflammation OR:<br>OR 3.9 (95% CI 2.2-6.9)<br>as leading predictors | High                                |

| <b>Cobalamin (B12)</b><br>Author<br>[main text<br>ref number] | Year | N CD<br>(HC) | P/R | Data on %<br>Deficiency<br>in CD | CD<br>vs<br>HC | Separate<br>reporting of<br>remission?<br>Definition of<br>remission<br>or Cohort<br>characteristics<br>(CCh) | Prevalence of<br>Deficiency<br>In CD remission<br>group or if not<br>separately reported<br>in CD group<br>Difference vs HC        | Supports<br>B12<br>deficiency<br>being<br>present in<br>CD<br>remission | Supports<br>B12 status<br>being<br>altered in Cd<br>remission in<br>comparison<br>with healthy<br>controls<br>(HC) | Exploration of cause<br>Subgroup analysis or<br>Special tests                                                                                                                                                                                                                                                            | Overall<br>Quality (see<br>table 2) |
|---------------------------------------------------------------|------|--------------|-----|----------------------------------|----------------|---------------------------------------------------------------------------------------------------------------|------------------------------------------------------------------------------------------------------------------------------------|-------------------------------------------------------------------------|--------------------------------------------------------------------------------------------------------------------|--------------------------------------------------------------------------------------------------------------------------------------------------------------------------------------------------------------------------------------------------------------------------------------------------------------------------|-------------------------------------|
| Battat [49]                                                   | 2017 | 66           | P   | X                                |                | Remission not<br>reported<br>separately<br><br>CCh:<br>83.3%<br>Remission<br>(HBI<5)                          | 7.6%<br>(B12 <148pmol/L)<br><br>3%<br>B12 <148pmol/L and<br>MMA >280nM/L)<br><br>6%<br>4 isolated MMA<br>elevation<br>(>280nMol/L) | Yes                                                                     | Not<br>reported                                                                                                    | Mean B12 if Ileal<br>resection >30cm (n=5)<br>lower those than those<br>with either no resection<br>or <30cm resected<br>(n=60).<br>177.0 vs 259.9 <i>P</i> 0.02<br><br>FUT2 mutations<br>explored vs B12 and<br>deficiency. No effect on<br>percentage deficient,<br>but homozygous FUT2<br>mutations had higher<br>B12 | Medium                              |

| <b>Cobalamin (B12)</b><br>Author<br>[main text<br>ref number] | Year | N CD<br>(HC) | P/R | Data on %<br>Deficiency<br>in CD | CD<br>vs<br>HC | Separate<br>reporting of<br>remission?<br>Definition of<br>remission<br>or Cohort<br>characteristics<br>(CCh)                                                                                                     | Prevalence of<br>Deficiency<br>In CD remission<br>group or if not<br>separately reported<br>in CD group<br>Difference vs HC | Supports<br>B12<br>deficiency<br>being<br>present in<br>CD<br>remission | Supports<br>B12 status<br>being<br>altered in Cd<br>remission in<br>comparison<br>with healthy<br>controls<br>(HC) | Exploration of cause<br>Subgroup analysis or<br>Special tests                            | Overall<br>Quality (see<br>table 2) |
|---------------------------------------------------------------|------|--------------|-----|----------------------------------|----------------|-------------------------------------------------------------------------------------------------------------------------------------------------------------------------------------------------------------------|-----------------------------------------------------------------------------------------------------------------------------|-------------------------------------------------------------------------|--------------------------------------------------------------------------------------------------------------------|------------------------------------------------------------------------------------------|-------------------------------------|
| De Castro<br>[53]                                             | 2019 | 31           | P   | X                                |                | Yes. Remission<br>defined with<br>endoscopy<br>( $<5$ , no deep<br>ulcers or) or<br>MRI with none<br>or creeping<br>fat, deep<br>ulcers or<br>oedema.<br><br>Mean (SD)<br>CDAI of this<br>group<br>41.35(+/-41.2) | 4.17%<br>( $<197\text{pg/mL}$ )                                                                                             | No                                                                      | Not<br>reported                                                                                                    | Mean B12 compared in<br>remission group to those<br>with endoscopy / MRI<br>activity- NS | Medium                              |
| Marcil [54]                                                   | 2019 | 274          | P   | X                                |                | Remission CD<br>not reported<br>separately<br><br>58% remission<br>(HBI $<5$ )                                                                                                                                    | 26.3%<br><br>( $<148\text{pmol/L}$ , or on<br>prescribed<br>supplement)                                                     | Yes                                                                     | Not clear /<br>reported                                                                                            | 52.7% of those with low<br>B12 were on<br>supplements                                    | Low                                 |

| <b>Cobalamin (B12)</b><br>Author<br>[main text<br>ref number] | Year | N CD<br>(HC) | P/R | Data on %<br>Deficiency<br>in CD | CD<br>vs<br>HC | Separate<br>reporting of<br>remission?<br>Definition of<br>remission<br>or Cohort<br>characteristics<br>(CCh)                                | Prevalence of<br>Deficiency<br>In CD remission<br>group or if not<br>separately reported<br>in CD group<br>Difference vs HC | Supports<br>B12<br>deficiency<br>being<br>present in<br>CD<br>remission | Supports<br>B12 status<br>being<br>altered in Cd<br>remission in<br>comparison<br>with healthy<br>controls<br>(HC) | Exploration of cause<br>Subgroup analysis or<br>Special tests                                                                                                                                                                                                                                            | Overall<br>Quality (see<br>table 2) |
|---------------------------------------------------------------|------|--------------|-----|----------------------------------|----------------|----------------------------------------------------------------------------------------------------------------------------------------------|-----------------------------------------------------------------------------------------------------------------------------|-------------------------------------------------------------------------|--------------------------------------------------------------------------------------------------------------------|----------------------------------------------------------------------------------------------------------------------------------------------------------------------------------------------------------------------------------------------------------------------------------------------------------|-------------------------------------|
| McMaster<br>[20]                                              | 2020 | 59           | P   | graph                            |                | All in clinical<br>remission<br><br>53% in<br>biochem<br>remission<br>(BCR) (FCP <<br>250, CRP <10<br>Alb >35)<br>(not report<br>separately) | 12%<br>(estimated from<br>graph)                                                                                            | Yes                                                                     | Not clear /<br>reported                                                                                            | Relationship between Alb,<br>FCP and crp explored with<br>Spearman's RHO- nil<br>correlation.<br><br>Exploration of phenotypic<br>predictors of deficiency<br>including supplements<br>(n=4) found no associations<br><br>Survival analysis of flare in<br>subsequent 12 months<br>found no relationship | Low                                 |

### Homocysteine (HcY)

| Homocysteine (HcY) [main text ref number] | Year | N CD (HC) | P/R | Data on % Deficiency in CD | CD vs HC | Separate reporting of remission? method used or % remission in group                     | Prevalence of Hyperhomocysteinemia (HHcy) In CD remission group or if not separately reported in CD group<br><br>Difference vs HC | Supports hyperHcY being present in CD remission | Supports HcY status being elevated in CD remission in comparison with healthy controls (HC) | Exploration of cause Subgroup analysis or Special tests                                                                                               | Overall Quality (see table 2) |
|-------------------------------------------|------|-----------|-----|----------------------------|----------|------------------------------------------------------------------------------------------|-----------------------------------------------------------------------------------------------------------------------------------|-------------------------------------------------|---------------------------------------------------------------------------------------------|-------------------------------------------------------------------------------------------------------------------------------------------------------|-------------------------------|
| Koutrobakis [25]                          | 2000 | 55        |     |                            | X        | No separate remission group.<br><br>CCh: 69% in remission (CDAI<150)                     | Mean +/-SD (μmol/L)<br>CD: 13.62+/-6.55<br>vs<br>HC: 9.59+/-3.39<br>P <0.05                                                       | Not reported                                    | Yes                                                                                         | homocysteine Negatively correlated with folate levels (r=-0.493, P < 0.01)                                                                            | Low                           |
| Roblin [33]                               | 2007 | 92        | P   | X                          |          | No separate remission group.<br><br>Cohort characteristics 38/55 (69%) in CDAI remission | 60% (>15μmol/l)<br><br>No HC comparators                                                                                          | Yes                                             | Not reported                                                                                | Primary aim of study was exploration of HHcy against BMD.<br><br>Univariate analysis found HHcy assoc with low osteoporosis (OR: 3.6 95% CI 3.98-250) | Medium                        |

| Homocysteine (HcY) [main text ref number] | Year | N CD (HC) | P/R | Data on % Deficiency in CD | CD vs HC | Separate reporting of remission? method used or % remission in group                  | Prevalence of Hyperhomocysteinemia (HHcy) In CD remission group or if not separately reported in CD group<br><br>Difference vs HC | Supports hyperHcY being present in CD remission | Supports HcY status being elevated in CD remission in comparison with healthy controls (HC) | Exploration of cause Subgroup analysis or Special tests                                                                                                                                                                                                                                                                                                                                                    | Overall Quality (see table 2) |
|-------------------------------------------|------|-----------|-----|----------------------------|----------|---------------------------------------------------------------------------------------|-----------------------------------------------------------------------------------------------------------------------------------|-------------------------------------------------|---------------------------------------------------------------------------------------------|------------------------------------------------------------------------------------------------------------------------------------------------------------------------------------------------------------------------------------------------------------------------------------------------------------------------------------------------------------------------------------------------------------|-------------------------------|
| Kallel [36]                               | 2011 | 89        | P   | X                          | X        | Remission CD not reported separately<br><br>CCh: 71.9% in remission (CDAI<150)        | 31.5% (>15µmol/l)<br><br>Mean (SD) CD: 13.7+/-4.84 vs HC 10.8+/-2.80<br><i>P</i> <0.001                                           | Yes                                             | Yes                                                                                         | multivariate analysis showed that HHC was positively associated with age [multi-adjusted odds-ratio (95% confidence interval): 1.14 (1.06–1.24); <i>p</i> <0.001], active disease [7.54 (1.15–49.3); <i>p</i> =0.03], disease duration [8.69 (1.53–49.3); <i>p</i> =0.02] and inversely related to plasma folate [0.64 (0.48–0.84); <i>p</i> =0.002] and vitamin B12 (0.993 (0.987–0.999); <i>p</i> =0.02] | High                          |
| Vagianos [39]                             | 2012 | 70        | P   | X                          |          | No separate remission CD group<br><br>CCh: 62.9% in remission (HBI<5) at every visit. | No data on baseline % with HyperHcY<br><br>15.7% fluctuating- i.e., 1 abnormal<br><br>2.9% persistent (>13µmol/L)                 | Yes                                             | Not reported                                                                                | Serum B12 weakly negatively correlated with HcY<br><i>r</i> -0.241 <i>P</i> 0.008                                                                                                                                                                                                                                                                                                                          | High                          |

## Vitamin C

| <b>Vitamin C</b><br>Author<br>[main text<br>ref<br>number] | Year | N CD<br>(HC) | P/R | Data on %<br>Deficiency<br>in CD | CD<br>vs<br>HC | Separate reporting<br>of remission?<br>Definition of<br>remission<br>or Cohort<br>characteristics (CCh) | Prevalence of<br>Deficiency<br>In CD remission<br>group or if not<br>separately<br>reported in CD<br>group<br><br>Difference vs HC                     | Supports<br>Vitamin C<br>deficiency<br>being<br>present in<br>CD<br>remission | Supports<br>Vitamin C<br>status being<br>altered in Cd<br>remission in<br>comparison<br>with healthy<br>controls (HC) | Exploration of<br>cause<br>Subgroup analysis<br>or<br>Special tests                                                                                                    | Overall<br>Quality<br>(see<br>table 2) |
|------------------------------------------------------------|------|--------------|-----|----------------------------------|----------------|---------------------------------------------------------------------------------------------------------|--------------------------------------------------------------------------------------------------------------------------------------------------------|-------------------------------------------------------------------------------|-----------------------------------------------------------------------------------------------------------------------|------------------------------------------------------------------------------------------------------------------------------------------------------------------------|----------------------------------------|
| Imes<br>[22]                                               | 1986 | 137          | P   | X                                |                | Remission not<br>reported separately<br><br>CCh:<br>70% in remission (CDAI<br><150)                     | 15% deficient<br>serum ascorbate<br><30µmol/L<br><br>37% low by<br>leucocyte<br>ascorbate<br><0.7µmol/10 <sup>9</sup><br>cells                         | Yes                                                                           | Not clear /<br>reported                                                                                               | Intake of<br>supplement and<br>diet was below RDA<br>in 20%. No diet vs<br>serum analysis<br>reported<br><br>Serum or leucocyte<br>ascorbate not<br>correlated to CDAI | Medium                                 |
| Geerling<br>[16]                                           | 1998 | 32           | P   | X                                | X              | No separate<br>remission group<br><br>(CCh):<br>Median CDAI 139,<br>53% remission (CDAI<br><150)        | Prevalence of<br>deficiency<br>(<11µmol/L):<br>50% (from graph)<br><br>Mean +/-SD<br>CD: 29.2+/-10.7<br>µmol/l<br>Vs<br>HC: 34.8+/-8.6 in<br>(P <0.05) | Yes                                                                           | Yes                                                                                                                   | Intake assessed<br>with FFQ:<br>Less than RDA<br>53% CD and 34%<br>HC. Intake NS<br>different<br><br>No reported intake<br>vs serum<br>correlation<br>analyses.        | Medium                                 |

| Vitamin C<br>Author<br>[main text<br>ref<br>number] | Year | N CD<br>(HC) | P/R | Data on %<br>Deficiency<br>in CD | CD<br>vs<br>HC | Separate reporting<br>of remission?<br>Definition of<br>remission<br>or Cohort<br>characteristics (CCh)               | Prevalence of<br>Deficiency<br>In CD remission<br>group or if not<br>separately<br>reported in CD<br>group<br><br>Difference vs HC                                   | Supports<br>Vitamin C<br>deficiency<br>being<br>present in<br>CD<br>remission | Supports<br>Vitamin C<br>status being<br>altered in Cd<br>remission in<br>comparison<br>with healthy<br>controls (HC) | Exploration of<br>cause<br>Subgroup analysis<br>or<br>Special tests                                                                | Overall<br>Quality<br>(see<br>table 2) |
|-----------------------------------------------------|------|--------------|-----|----------------------------------|----------------|-----------------------------------------------------------------------------------------------------------------------|----------------------------------------------------------------------------------------------------------------------------------------------------------------------|-------------------------------------------------------------------------------|-----------------------------------------------------------------------------------------------------------------------|------------------------------------------------------------------------------------------------------------------------------------|----------------------------------------|
| Geerling<br>[17]                                    | 1999 | 62           | P   |                                  | X              | Yes, mean of 50 Cd<br>remission reported<br><br>(defined by Van<br>Hees <150)                                         | Prevalence of<br>deficiency not<br>reported<br><br>Median (IQR) in<br>CD remission:<br>38.0 (26.8-57.0)<br>μmol/l<br>Vs<br>HC: 31.0 (27.0-<br>38.3) μmol/l<br>P 0.02 | Not clear /<br>reported                                                       | Yes                                                                                                                   | Serum Vit C in CDa vs<br>CDr NS                                                                                                    | Medium                                 |
| Geerling<br>[18]                                    | 2000 | 23           | P   |                                  | X              | Remission not<br>reported separately<br>(CCh):<br>87% in remission<br>(CDAI <150)<br>Mean (+/-SD) CDAI<br>96.9+/-66.5 | Prevalence of<br>deficiency not<br>reported<br><br>Mean +/- SD in<br>CD:<br>54.5+/-22.9<br>μmol/L<br>Vs HC:<br>47.6+/-17.7 μmol/L<br>NS                              | Not clear /<br>reported                                                       | No                                                                                                                    | Intake of Vit C<br><br>assessed with FFQ<br>and diary<br>CD vs HC NS<br>No reported intake<br>vs serum<br>correlation<br>analyses. | High                                   |



| <b>Vitamin C</b><br>Author<br>[main text<br>ref<br>number] | Year | N CD<br>(HC) | P/R | Data on %<br>Deficiency<br>in CD | CD<br>vs<br>HC | Separate reporting<br>of remission?<br>Definition of<br>remission<br>or Cohort<br>characteristics (CCh)               | Prevalence of<br>Deficiency<br>In CD remission<br>group or if not<br>separately<br>reported in CD<br>group<br><br>Difference vs HC                            | Supports<br>Vitamin C<br>deficiency<br>being<br>present in<br>CD<br>remission | Supports<br>Vitamin C<br>status being<br>altered in Cd<br>remission in<br>comparison<br>with healthy<br>controls (HC) | Exploration of<br>cause<br>Subgroup analysis<br>or<br>Special tests                                                                                                                                                                                                                                                                    | Overall<br>Quality<br>(see<br>table 2) |
|------------------------------------------------------------|------|--------------|-----|----------------------------------|----------------|-----------------------------------------------------------------------------------------------------------------------|---------------------------------------------------------------------------------------------------------------------------------------------------------------|-------------------------------------------------------------------------------|-----------------------------------------------------------------------------------------------------------------------|----------------------------------------------------------------------------------------------------------------------------------------------------------------------------------------------------------------------------------------------------------------------------------------------------------------------------------------|----------------------------------------|
| Wendland<br>[28]                                           | 2000 | 34           | P   |                                  | X              | Not for comparison<br>of Vit A with HC<br>CCh:<br>70% in remission<br>(CDAI <150)<br>CDAI Mean +/- SEM<br>141+/-18.66 | Vitamin C (mean<br>+/-SEM) lower in<br>CD:<br>64.03+/-4.6<br>than<br>HC:78.4+/-2.9<br><i>P</i> <0.05<br><br>**mean +/- SEM<br>in CDr (CDAI<150)<br>69.8+/-6.3 | Not<br>reported                                                               | No                                                                                                                    | Intake of Vit C in CD<br>not reduced vs HC<br>on 7-day food<br>diary. No<br>correlation<br>analyses of intake<br>to plasma<br>concentration<br>Vit C concentration<br>negatively<br>correlated to CDAI,<br>serum osromucoid,<br>but not lipid<br>peroxidation as<br>measured by<br>breath pentanes<br>(which was lower in<br>CD vs HC) | Medium                                 |

| <b>Vitamin C</b><br>Author<br>[main text<br>ref<br>number] | Year | N CD<br>(HC) | P/R | Data on %<br>Deficiency<br>in CD | CD<br>vs<br>HC | Separate reporting<br>of remission?<br>Definition of<br>remission<br>or Cohort<br>characteristics (CCh)                                      | Prevalence of<br>Deficiency<br>In CD remission<br>group or if not<br>separately<br>reported in CD<br>group<br><br>Difference vs HC                             | Supports<br>Vitamin C<br>deficiency<br>being<br>present in<br>CD<br>remission | Supports<br>Vitamin C<br>status being<br>altered in Cd<br>remission in<br>comparison<br>with healthy<br>controls (HC) | Exploration of<br>cause<br>Subgroup analysis<br>or<br>Special tests                                                                                                                                                                                                                         | Overall<br>Quality<br>(see<br>table 2) |
|------------------------------------------------------------|------|--------------|-----|----------------------------------|----------------|----------------------------------------------------------------------------------------------------------------------------------------------|----------------------------------------------------------------------------------------------------------------------------------------------------------------|-------------------------------------------------------------------------------|-----------------------------------------------------------------------------------------------------------------------|---------------------------------------------------------------------------------------------------------------------------------------------------------------------------------------------------------------------------------------------------------------------------------------------|----------------------------------------|
| Filippi [19]                                               | 2006 | 54           | P   | X                                | X              | All in remission<br>(CDAI <150) All in<br>remission<br><br>CDAI<br>All subjects needed<br>3/12 (CDAI <150)<br><br>Mean CRP<br>6.6-/-0.8mg/dl | 85%<br>(no reference<br>ranges)<br>in graph only<br><br>Biochemical<br>analysis of HC not<br>reported (either<br>as prevalence of<br>deficiency or<br>results) | Yes                                                                           | Not clear /<br>reported                                                                                               | Mean Vit C intake<br>assessed with 3-day<br>food diary in CD<br>and compared vs<br>HC in male and<br>female separately<br>Intake CD F < HC F<br>46.07+/-5.62 vs<br>96.55+/-12.84<br>P<0.005<br>And CD M < HC M:<br>56.10+/-8.43 vs<br>96.75+/-15.76<br>P<0.05<br>All groups < French<br>RDA | Low                                    |

| <b>Vitamin C</b><br>Author<br>[main text<br>ref<br>number] | Year | N CD<br>(HC) | P/R | Data on %<br>Deficiency<br>in CD | CD<br>vs<br>HC | Separate reporting<br>of remission?<br>Definition of<br>remission<br>or Cohort<br>characteristics (CCh)                                | Prevalence of<br>Deficiency<br>In CD remission<br>group or if not<br>separately<br>reported in CD<br>group<br><br>Difference vs HC | Supports<br>Vitamin C<br>deficiency<br>being<br>present in<br>CD<br>remission | Supports<br>Vitamin C<br>status being<br>altered in Cd<br>remission in<br>comparison<br>with healthy<br>controls (HC) | Exploration of<br>cause<br>Subgroup analysis<br>or<br>Special tests                                                                                                                                                                                                                                   | Overall<br>Quality<br>(see<br>table 2) |
|------------------------------------------------------------|------|--------------|-----|----------------------------------|----------------|----------------------------------------------------------------------------------------------------------------------------------------|------------------------------------------------------------------------------------------------------------------------------------|-------------------------------------------------------------------------------|-----------------------------------------------------------------------------------------------------------------------|-------------------------------------------------------------------------------------------------------------------------------------------------------------------------------------------------------------------------------------------------------------------------------------------------------|----------------------------------------|
| MacMaster<br>[20]                                          | 2021 | 59           | P   | X                                |                | All in clinical<br>remission<br><br>53% in biochem<br>remission (BCR) (FCP<br>< 250, CRP <10 alb<br>>35)<br>(not report<br>separately) | 17%<br>(<15µmol/L)                                                                                                                 | Yes                                                                           | Not clear /<br>reported                                                                                               | Relationship between<br>alb, FCP and crp<br>explored with<br>Spearman's RHO- nil<br>correlation.<br><br>Exploration of<br>phenotypic predictors<br>of Vit C serum<br>concentrations found<br>no associations<br><br>Survival analysis vs<br>flare in subsequent<br>12 months found no<br>relationship | Medium                                 |

## Calcium

| Calcium<br>Author<br>[main text<br>ref number] | Year | N CD<br>(HC) | P/R | Data on %<br>Deficiency<br>in CD | CD<br>vs<br>HC | Separate<br>reporting of<br>remission?<br>method used<br>or<br>% remission in<br>group                                                                           | Prevalence of<br>Deficiency<br>In CD remission<br>group or if not<br>separately<br>reported in CD<br>group<br><br>Difference vs HC                                     | Supports<br>Calcium<br>deficiency<br>being<br>present in<br>CD<br>remission | Supports<br>Calcium status<br>being altered in<br>Cd remission in<br>comparison<br>with healthy<br>controls (HC) | Exploration of cause<br>Subgroup analysis or<br>Special tests                                                                                                                                                                                 | Overall<br>Quality<br>(see<br>table 2) |
|------------------------------------------------|------|--------------|-----|----------------------------------|----------------|------------------------------------------------------------------------------------------------------------------------------------------------------------------|------------------------------------------------------------------------------------------------------------------------------------------------------------------------|-----------------------------------------------------------------------------|------------------------------------------------------------------------------------------------------------------|-----------------------------------------------------------------------------------------------------------------------------------------------------------------------------------------------------------------------------------------------|----------------------------------------|
| Tajika [30]                                    | 2004 | 33<br>(15)   |     |                                  | X              | No separate<br>reporting of<br>remission. CCh:<br>Mean CDAI<br>84.1 +/-44.2<br>(range, 12.6–<br>182.7)                                                           | No reported<br>prevalence<br><br>Mean (SD) Calcium<br>CD: 9.3+/-0.7 vs HC<br>9.2 +/-0.3<br>NS                                                                          | Not<br>reported                                                             | No                                                                                                               | Nil relationship to 25 OD<br>in correlation (study was<br>primarily reported as a 25<br>OH D paper)                                                                                                                                           | High                                   |
| Fillipi [19]                                   | 2006 | 54           | P   | X                                | X              | All in remission<br>(CDAI <150) All<br>in remission<br><br>CDAI<br>All subjects<br>needed<br>3/12 (CDAI<br><150)<br><br>Mean CRP<br>6.6/-0.8mg/dl<br>(~63nmol/L) | 5% (estimated<br>from graph)<br>(no reference<br>ranges)<br><br>Biochemical<br>analysis of HC not<br>reported (either as<br>prevalence of<br>deficiency or<br>results) | Yes                                                                         | Not reported                                                                                                     | Mean Ca intake assessed<br>with 3-day food diary in<br>CD and compared vs HC in<br>male and female<br>separately<br><br>Intake in CD f (n=28) vs HC<br>f (n=16) and CD m (n=26)<br>vs HC m (n=9)<br>NS<br>All groups < French RDA<br>(900mg). | Low                                    |

## Copper

| <b>Copper</b><br>Author<br>[main text<br>ref<br>number] | Year | N<br>CD<br>(HC) | P/R | Data on %<br>Deficiency<br>in CD | CD<br>vs<br>HC | Separate<br>reporting of<br>remission?<br>method<br>used<br>or<br>% remission<br>in group                 | Prevalence of Deficiency<br>In CD remission group<br>or if not separately<br>reported in CD group<br>Difference vs HC                                         | Supports<br>Copper<br>deficiency<br>being<br>present in<br>CD<br>remission | Supports<br>Copper status<br>being altered<br>in Cd<br>remission in<br>comparison<br>with healthy<br>controls (HC) | Exploration of cause<br>Subgroup analysis or<br>Special tests                                                                                                                                            | Overall<br>Quality<br>(see<br>table 2) |
|---------------------------------------------------------|------|-----------------|-----|----------------------------------|----------------|-----------------------------------------------------------------------------------------------------------|---------------------------------------------------------------------------------------------------------------------------------------------------------------|----------------------------------------------------------------------------|--------------------------------------------------------------------------------------------------------------------|----------------------------------------------------------------------------------------------------------------------------------------------------------------------------------------------------------|----------------------------------------|
| Geerling<br>[16]                                        | 1998 | 32              | P   | X                                | X              | No separate<br>remission<br>group<br><br>(CCh):<br>Median<br>CDAI 139,<br>53%<br>remission<br>(CDAI <150) | No deficient cases<br>(<12µmol/L):<br>Mean +/-SD<br>CD: 19.1 +/-4.61 µmol/l<br>Vs<br>HC: 20.1+/-6.90 (NS)                                                     | No                                                                         | No                                                                                                                 | Intake not among<br>micronutrients assessed                                                                                                                                                              | Medium                                 |
| Geerling<br>[17]                                        | 1999 | 62              | P   |                                  | X              | Yes, mean<br>of 50 CD<br>remission<br>reported<br><br>(defined by<br>Van Hees<br><150)                    | Prevalence of deficiency<br>not reported<br><br>Median (IQR) in CD<br>remission:<br>19.9 (17.1-23.7) µmol/l<br>Vs<br>HC: 18.0 (15.1-25.2)<br>µmol/l<br>P 0.14 | Not<br>reported                                                            | No                                                                                                                 | Intake of assessed with FFQ<br>but only comparison<br>between CD active and CD<br>remission <i>NS</i><br><br>Serum Cu in CDa vs CDr<br>higher:<br>26.2 (21.3-38.8) vs<br>19.9(17.1-23.7) <i>P</i> 0.0009 | Medium                                 |

| <b>Copper</b><br>Author<br>[main text<br>ref<br>number] | Year | N<br>CD<br>(HC) | P/R | Data on %<br>Deficiency<br>in CD | CD<br>vs<br>HC | Separate<br>reporting of<br>remission?<br>method<br>used<br>or<br>% remission<br>in group                                                       | Prevalence of Deficiency<br>In CD remission group<br>or if not separately<br>reported in CD group<br>Difference vs HC   | Supports<br>Copper<br>deficiency<br>being<br>present in<br>CD<br>remission | Supports<br>Copper status<br>being altered<br>in Cd<br>remission in<br>comparison<br>with healthy<br>controls (HC) | Exploration of cause<br>Subgroup analysis or<br>Special tests                                                                                                                                                                                                            | Overall<br>Quality<br>(see<br>table 2) |
|---------------------------------------------------------|------|-----------------|-----|----------------------------------|----------------|-------------------------------------------------------------------------------------------------------------------------------------------------|-------------------------------------------------------------------------------------------------------------------------|----------------------------------------------------------------------------|--------------------------------------------------------------------------------------------------------------------|--------------------------------------------------------------------------------------------------------------------------------------------------------------------------------------------------------------------------------------------------------------------------|----------------------------------------|
| Geerling<br>[18]                                        | 2000 | 23              | P   |                                  | X              | Remission<br>not reported<br>separately<br>(CCh):<br>87% in<br>remission<br>(CDAI <150)<br>Mean (+/-<br>SD) CDAI<br>96.9+/-66.5                 | Prevalence of deficiency<br>not reported<br>Mean +/- SD in CD:<br>23.6+/-8.9 µmol/L<br>Vs HC:<br>22.2+/-7.4µmol/L<br>NS | Not<br>reported                                                            | No                                                                                                                 | Intake not among<br>micronutrients assessed                                                                                                                                                                                                                              | High                                   |
| MacMaster<br>[20]                                       | 2021 | 59              | P   | X                                |                | All in clinical<br>remission<br><br>53% in<br>biochem<br>remission<br>(BCR) (FCP <<br>250, CRP<br><10 Alb<br>>35)<br>(not report<br>separately) | 5%<br><10µmol/L men<br><11µmol/L women                                                                                  | Yes                                                                        | Not reported                                                                                                       | Relationship between Alb, FCP<br>and crp explored with<br>Spearman's RHO. Only CRP<br>related (rho=0.41 p<0.001)<br><br>No exploration of phenotypic<br>predictors of deficiency done.<br>Survival analysis vs flare in<br>subsequent 12 months found<br>no relationship | Medium                                 |

## Manganese

| <b>Manganese</b><br>Author<br>[main text<br>ref number] | Year | N<br>CD<br>(HC) | P/R | Data on %<br>Deficiency<br>in CD | CD<br>vs<br>HC | Separate<br>reporting of<br>remission?<br>method<br>used<br>or<br>% remission<br>in group                                                          | Prevalence of<br>Deficiency<br>In CD remission<br>group or if not<br>separately reported<br>in CD group<br><br>Difference vs HC | Supports<br>Manganese<br>deficiency<br>being<br>present in<br>CD<br>remission | Supports<br>Manganese<br>status being<br>altered in Cd<br>remission in<br>comparison<br>with healthy<br>controls<br>(HC) | Exploration of cause<br>Subgroup analysis or<br>Special tests                                                                                                                                                                                    | Overall<br>Quality<br>(see<br>table 2) |
|---------------------------------------------------------|------|-----------------|-----|----------------------------------|----------------|----------------------------------------------------------------------------------------------------------------------------------------------------|---------------------------------------------------------------------------------------------------------------------------------|-------------------------------------------------------------------------------|--------------------------------------------------------------------------------------------------------------------------|--------------------------------------------------------------------------------------------------------------------------------------------------------------------------------------------------------------------------------------------------|----------------------------------------|
| MacMaster<br>[20]                                       | 2021 | 59              | P   | X                                |                | All in<br>clinical<br>remission<br><br>53% in<br>biochem<br>remission<br>(BCR) (FCP<br>< 250, CRP<br><10 Alb<br>>35)<br>(not report<br>separately) | Nil reported<br><70nmol/L                                                                                                       | Yes                                                                           | Not clear /<br>reported                                                                                                  | Relationship between Alb, FCP and<br>crp explored with Spearman's RHO.<br>No correlation.<br>No exploration of phenotypic<br>predictors of deficiency done<br><br>Survival analysis vs flare in<br>subsequent 12 months found no<br>relationship | Medium                                 |

## Magnesium

| <b>Magnesium</b><br>Author [main text ref number] | Year | N CD (HC) | P/R | Data on % Deficiency in CD | CD vs HC | Separate reporting of remission? method used or % remission in group                 | Prevalence of Deficiency In CD remission group or if not separately reported in CD group Difference vs HC               | Supports Magnesium deficiency being present in CD remission | Supports Magnesium status being altered in Cd remission in comparison with healthy controls (HC) | Exploration of cause Subgroup analysis or Special tests | Overall Quality (see table 2) |
|---------------------------------------------------|------|-----------|-----|----------------------------|----------|--------------------------------------------------------------------------------------|-------------------------------------------------------------------------------------------------------------------------|-------------------------------------------------------------|--------------------------------------------------------------------------------------------------|---------------------------------------------------------|-------------------------------|
| Geerling [16]                                     | 1998 | 32        | P   | X                          | X        | No separate remission group<br><br>(CCh): Median CDAI 139, 53% remission (CDAI <150) | 50% deficient (<0.75mmol/L)<br><br>Mean +/-SD<br>CD: 0.79 +/-0.07 mmol/l<br>Vs<br>HC: 0.85+/-0.07 (P<0.01)              | Yes                                                         | Yes                                                                                              | Assessment of intake did not include Magnesium          | Medium                        |
| Geerling [18]                                     | 2000 | 23        | P   |                            | X        | Remission not reported separately<br><br>CDAI Mean CDAI 96.9+/-66.5. 83% CDAI <150   | Prevalence of deficiency not reported<br><br>Mean +/- SD in CD: 0.79+/-0.09 mmol/L<br>Vs<br>HC: 0.82+/-0.06mmol/L<br>NS | Not clear / reported                                        | No                                                                                               | Assessment of intake did not include Magnesium          | Medium                        |



| <b>Magnesium</b><br>Author [main text ref number] | Year | N CD (HC) | P/R | Data on % Deficiency in CD | CD vs HC | Separate reporting of remission? method used or % remission in group                                                                     | Prevalence of Deficiency In CD remission group or if not separately reported in CD group Difference vs HC                                            | Supports Magnesium deficiency being present in CD remission | Supports Magnesium status being altered in Cd remission in comparison with healthy controls (HC) | Exploration of cause Subgroup analysis or Special tests                                                                                                                                                                       | Overall Quality (see table 2) |
|---------------------------------------------------|------|-----------|-----|----------------------------|----------|------------------------------------------------------------------------------------------------------------------------------------------|------------------------------------------------------------------------------------------------------------------------------------------------------|-------------------------------------------------------------|--------------------------------------------------------------------------------------------------|-------------------------------------------------------------------------------------------------------------------------------------------------------------------------------------------------------------------------------|-------------------------------|
| Tajika [30]                                       | 2004 | 33 (15)   |     | X                          | X        | No separate reporting of remission.<br>CCh: Mean CDAI 84.1 +/-44.2 (range, 12.6–182.7)                                                   | No reported prevalence<br><br>Mean (SD) Mg CD: 2.2+/-0.2 vs HC 2.4+/-0.2 +/-0.3 <i>P</i> <0.01                                                       | Not reported                                                | Yes                                                                                              | nil                                                                                                                                                                                                                           | High                          |
| Filippi [19]                                      | 2006 | 54        | P   | X                          | X        | All in remission (CDAI <150)<br>All in remission<br><br>CDAI All subjects needed 3/12 (CDAI <150)<br>Mean CRP 6.6-/-0.8mg/dl (~63nmol/L) | 2% (no reference ranges)<br>Estimated from graph only<br><br>Biochemical analysis of HC not reported (either as prevalence of deficiency or results) | Low prevalence only                                         | Not clear / reported                                                                             | Mean Mg Intake assessed with 3-day food diary in CD and compared vs HC in m and f separately<br><br>Intake in CD f less than HC f 198.29+/-8.33mg/day vs 239.25+/-18.08 <i>P</i> <0.01<br>CD m (n=26) vs HC m (n=9) <i>NS</i> | Low                           |
| Valentini [35]                                    | 2008 | 94        | P   | X                          | X        | All in remission (CDAI <150)                                                                                                             | 28.7% (<0.75nmol/L)<br><br>Conc vs sex matched HC <i>NS</i>                                                                                          | Yes                                                         | No                                                                                               | nil                                                                                                                                                                                                                           | High                          |

| <b>Magnesium</b><br>Author [main text ref number] | Year | N CD (HC) | P/R | Data on % Deficiency in CD | CD vs HC | Separate reporting of remission? method used or % remission in group                                                                                                       | Prevalence of Deficiency In CD remission group or if not separately reported in CD group Difference vs HC | Supports Magnesium deficiency being present in CD remission | Supports Magnesium status being altered in Cd remission in comparison with healthy controls (HC) | Exploration of cause Subgroup analysis or Special tests                                                                                                                                                                                                                         | Overall Quality (see table 2) |
|---------------------------------------------------|------|-----------|-----|----------------------------|----------|----------------------------------------------------------------------------------------------------------------------------------------------------------------------------|-----------------------------------------------------------------------------------------------------------|-------------------------------------------------------------|--------------------------------------------------------------------------------------------------|---------------------------------------------------------------------------------------------------------------------------------------------------------------------------------------------------------------------------------------------------------------------------------|-------------------------------|
| De Castro [53]                                    | 2019 | 31        | P   | X                          |          | Yes. Remission defined with endoscopy (<5, no deep ulcers or) or MRI with none or creeping fat, deep ulcers or oedema.<br><br>Mean (SD) CDAI of this group 41.35(+/- 41.2) | 15.38% (cut off not provided)                                                                             | Yes                                                         | Not reported                                                                                     | Mean Mg compared in remission group to those with endoscopy / MRI activity- NS                                                                                                                                                                                                  | Medium                        |
| MacMaster [20]                                    | 2021 | 59        | P   | X                          |          | All in clinical remission<br><br>53% in biochem remission (BCR) (FCP < 250, CRP <10 alb >35) (not report separately)                                                       | 7% (0.7mmol/L)                                                                                            | Yes                                                         | Not clear / reported                                                                             | Relationship between alb, FCP and crp explored with Spearman's RHO. Only FCP correlated with serum Mg (rho = -0.26, p= 0.044)<br><br>No exploration of phenotypic predictors of deficiency done<br><br>Survival analysis vs flare in subsequent 12 months found no relationship | Medium                        |

## Phosphorous

| Phosphorous<br>Author [main<br>text ref<br>number] | Year | N<br>CD<br>(HC) | P/R | Data on %<br>Deficiency<br>in CD | CD<br>vs<br>HC | Separate<br>reporting of<br>remission?<br>method<br>used<br>or<br>% remission<br>in group                                                                                   | Prevalence of<br>Deficiency<br>In CD remission<br>group or if not<br>separately<br>reported in CD<br>group<br>Difference vs<br>HC                                               | Supports<br>Phosphorous<br>deficiency<br>being present<br>in CD<br>remission | Supports<br>Phosphorous<br>status being<br>altered in Cd<br>remission in<br>comparison<br>with healthy<br>controls (HC) | Exploration of cause<br>Subgroup analysis or<br>Special tests                                                                                                                                                                 | Overall<br>Quality<br>(see<br>table 2) |
|----------------------------------------------------|------|-----------------|-----|----------------------------------|----------------|-----------------------------------------------------------------------------------------------------------------------------------------------------------------------------|---------------------------------------------------------------------------------------------------------------------------------------------------------------------------------|------------------------------------------------------------------------------|-------------------------------------------------------------------------------------------------------------------------|-------------------------------------------------------------------------------------------------------------------------------------------------------------------------------------------------------------------------------|----------------------------------------|
| Tajika [30]                                        | 2004 | 33<br>(15)      |     | X                                | X              | No separate<br>reporting of<br>remission.<br>CCh: Mean<br>CDAI<br>84.1 +/-44.2<br>(range,<br>12.6–182.7)                                                                    | No reported<br>prevalence<br><br>Mean (SD) P<br>CD: 3.2+/-0.6 vs<br>HC 3.5+/-0.6<br><i>P</i> <0.05                                                                              | Not reported                                                                 | Yes                                                                                                                     |                                                                                                                                                                                                                               | High                                   |
| Filippi [19]                                       | 2006 | 54              | P   | X                                | X              | All in<br>remission<br>(CDAI <150)<br>All in<br>remission<br><br>CDAI<br>All subjects<br>needed<br>3/12 (CDAI<br><150)<br><br>Mean CRP<br>6.6-/-<br>0.8mg/dl<br>(~63nmol/L) | 8%<br>(no reference<br>ranges)<br>Estimated from<br>graph only<br><br>Biochemical<br>analysis of HC<br>not reported<br>(either as<br>prevalence of<br>deficiency or<br>results) | Yes                                                                          | Not clear /<br>reported                                                                                                 | Mean intake assessed with 3-<br>day food diary in CD and<br>compared vs HC in male and<br>female separately<br><br>Intake in CD f (n=28) vs HC f<br>(n=16) and CD m (n=26) vs HC<br>m (n=9)<br>NS<br>All groups > French RDA. | Low                                    |

## Selenium

| <b>Selenium</b><br>Author<br>[main text<br>ref<br>number] | Year | N<br>CD<br>(HC) | P/R | Data on %<br>Deficiency<br>in CD | CD vs<br>HC | Separate<br>reporting of<br>remission?<br>method used<br>or<br>% remission<br>in group                    | Prevalence of<br>Deficiency<br>In CD remission<br>group or if not<br>separately<br>reported in CD<br>group<br>Difference vs HC                                                                      | Supports<br>Selenium<br>deficiency<br>being<br>present in<br>CD<br>remission | Supports<br>Selenium<br>status being<br>altered in Cd<br>remission in<br>comparison<br>with healthy<br>controls (HC) | Exploration of cause<br>Subgroup analysis or<br>Special tests | Overall<br>Quality<br>(see<br>table 2) |
|-----------------------------------------------------------|------|-----------------|-----|----------------------------------|-------------|-----------------------------------------------------------------------------------------------------------|-----------------------------------------------------------------------------------------------------------------------------------------------------------------------------------------------------|------------------------------------------------------------------------------|----------------------------------------------------------------------------------------------------------------------|---------------------------------------------------------------|----------------------------------------|
| Geerling<br>[16]                                          | 1998 | 32              | P   | X                                | X           | No separate<br>remission<br>group<br><br>(CCh):<br>Median CDAI<br>139,<br>53%<br>remission<br>(CDAI <150) | 50% deficient<br>( $<0.91\mu\text{mol/L}$ ):<br><br>Mean +/-SD<br>CD: $0.86 \pm 0.14$<br>mmol/l<br>Vs<br>HC: $1.03 \pm 0.15$<br>( $P < 0.01$ )                                                      | Yes                                                                          | Yes                                                                                                                  | Intake not among<br>micronutrients assessed                   | Medium                                 |
| Geerling<br>[17]                                          | 1999 | 62              | P   |                                  | X           | Yes, mean of<br>50 CD<br>remission<br>reported<br><br>(defined by<br>Van Hees<br><150)                    | Prevalence of<br>deficiency not<br>reported<br><br>Median (IQR) in<br>CD remission:<br>$0.87 (0.76-1.02)$<br>$\mu\text{mol/l}$<br>Vs<br>HC: $1.00 (0.89-1.12)$<br>$\mu\text{mol/l}$<br>$P < 0.0001$ | Not<br>reported                                                              | Yes                                                                                                                  | Serum Selenium in CDa<br>vs CDr NS                            | Medium                                 |

| <b>Selenium</b><br>Author<br>[main text<br>ref<br>number] | Year | N<br>CD<br>(HC) | P/R | Data on %<br>Deficiency<br>in CD | CD vs<br>HC | Separate<br>reporting of<br>remission?<br>method used<br>or<br>% remission<br>in group                                         | Prevalence of<br>Deficiency<br>In CD remission<br>group or if not<br>separately<br>reported in CD<br>group<br>Difference vs HC         | Supports<br>Selenium<br>deficiency<br>being<br>present in<br>CD<br>remission | Supports<br>Selenium<br>status being<br>altered in Cd<br>remission in<br>comparison<br>with healthy<br>controls (HC) | Exploration of cause<br>Subgroup analysis or<br>Special tests                                                                                                                            | Overall<br>Quality<br>(see<br>table 2) |
|-----------------------------------------------------------|------|-----------------|-----|----------------------------------|-------------|--------------------------------------------------------------------------------------------------------------------------------|----------------------------------------------------------------------------------------------------------------------------------------|------------------------------------------------------------------------------|----------------------------------------------------------------------------------------------------------------------|------------------------------------------------------------------------------------------------------------------------------------------------------------------------------------------|----------------------------------------|
| Geerling<br>[18]                                          | 2000 | 23              | P   |                                  | X           | Remission not<br>reported<br>separately<br>(CCh):<br>87% in<br>remission<br>(CDAI <150)<br>Mean (+/-SD)<br>CDAI<br>96.9+/-66.5 | Prevalence of<br>deficiency not<br>reported<br><br>Mean +/- SD in<br>CD: 0.79+/-0.09<br>mmol/L<br>Vs<br>HC:<br>0.82+/-0.06mmol/L<br>NS | Not<br>reported                                                              | No                                                                                                                   | Intake not among<br>micronutrients assessed                                                                                                                                              | Medium                                 |
| Wendland<br>[28]                                          | 2000 | 34              | P   |                                  | X           | Not for<br>comparison<br>of Se with HC<br>CCh:<br>70% in<br>remission<br>(CDAI <150)<br>CDAI Mean<br>+/- SEM<br>141+/-18.66    | No CD diff v HC<br>0.81 +/-0.0035<br>µmol/L vs<br>0.80 +/- 0.036<br>µmol/L<br>NS                                                       | Not<br>reported                                                              | No                                                                                                                   | Selenium intake not<br>assessed on 7-day food<br>diary.<br>Se concentration not<br>correlated to CDAI,<br>serum osromucoid or<br>lipid peroxidation as<br>measured by breath<br>pentanes | Medium                                 |
| Valentini<br>[35]                                         | 2008 | 94              | P   | X                                | X           | All in<br>remission<br>(CDAI <150)                                                                                             | 61.3%<br>(<0.59µmol/L)<br><br>Conc lower in men<br>than sex matched<br>HC. Women- NS                                                   | Yes                                                                          | Yes                                                                                                                  | nil                                                                                                                                                                                      | High                                   |

| <b>Selenium</b><br>Author<br>[main text<br>ref<br>number] | Year | N<br>CD<br>(HC) | P/R | Data on %<br>Deficiency<br>in CD | CD vs<br>HC | Separate<br>reporting of<br>remission?<br>method used<br>or<br>% remission<br>in group                                                                     | Prevalence of<br>Deficiency<br>In CD remission<br>group or if not<br>separately<br>reported in CD<br>group<br>Difference vs HC | Supports<br>Selenium<br>deficiency<br>being<br>present in<br>CD<br>remission | Supports<br>Selenium<br>status being<br>altered in Cd<br>remission in<br>comparison<br>with healthy<br>controls (HC) | Exploration of cause<br>Subgroup analysis or<br>Special tests                                                                                                                                                                                                                                                                             | Overall<br>Quality<br>(see<br>table 2) |
|-----------------------------------------------------------|------|-----------------|-----|----------------------------------|-------------|------------------------------------------------------------------------------------------------------------------------------------------------------------|--------------------------------------------------------------------------------------------------------------------------------|------------------------------------------------------------------------------|----------------------------------------------------------------------------------------------------------------------|-------------------------------------------------------------------------------------------------------------------------------------------------------------------------------------------------------------------------------------------------------------------------------------------------------------------------------------------|----------------------------------------|
| MacMaster<br>[20]                                         | 2021 | 59              | P   | graph                            |             | All in clinical<br>remission<br>(CDAI<150)<br><br>53% in<br>biochem<br>remission<br>(BCR) (FCP <<br>250, CRP <10<br>Alb >35)<br>(not report<br>separately) | 5.1%<br><0.75µmol/L<br><br>0%<br>(Using RBC<br>Selenium<br><30.0nmol/g Hb)                                                     | Yes                                                                          | Not reported                                                                                                         | Relationship between Alb,<br>FCP and crp explored with<br>Spearman's RHO. Alb and<br>CRP significantly correlated<br>(rho = 0.28; $p = 0.007$ and<br>rho= -0.28 $p = 0.006$<br><br>No exploration of<br>phenotypic predictors of<br>deficiency done<br><br>Survival analysis vs flare in<br>subsequent 12 months<br>found no relationship | Medium                                 |

## Zinc

| <b>Zinc</b><br>Author<br>[main text<br>ref number] | Year | N<br>CD<br>(HC) | P/R | Data<br>on %<br>Defici<br>ency<br>in CD | CD<br>vs<br>HC | Separate<br>reporting of<br>remission?<br>method used<br>or<br>% remission in<br>group                                                                                                              | Prevalence of<br>Deficiency<br>In CD remission<br>group or if not<br>separately<br>reported in CD<br>group<br>Difference vs HC                                                                                                | Supports<br>Zinc<br>deficiency<br>being<br>present in<br>CD<br>remission | Supports<br>Zinc status<br>being<br>altered in Cd<br>remission in<br>comparison<br>with healthy<br>controls (HC) | Exploration of cause<br>Subgroup analysis or<br>Special tests     | Overall<br>Quality (see<br>table 2) |
|----------------------------------------------------|------|-----------------|-----|-----------------------------------------|----------------|-----------------------------------------------------------------------------------------------------------------------------------------------------------------------------------------------------|-------------------------------------------------------------------------------------------------------------------------------------------------------------------------------------------------------------------------------|--------------------------------------------------------------------------|------------------------------------------------------------------------------------------------------------------|-------------------------------------------------------------------|-------------------------------------|
| Schoelmerich [21]                                  | 1985 | 38<br>(19)      | P   |                                         | X              | Yes, reports<br>“mildly active”<br>CDAI <150,<br>mild<br>laboratory<br>changes no<br>active<br>symptoms and<br>“inactive”<br>with<br>CDAI<150, no<br>laboratory<br>changes or<br>active<br>symptoms | 35% in “mildly<br>active” group<br>12.5% in<br>“inactive” group<br>(<0.7µg/dl)<br>Zn lower in<br>“inactive” and<br>“mildly active”<br>CD group vs HC<br>79.1+/-14.3<br>µg/dl and<br>86.5+/-13.6 vs<br>95.3+/-13.0<br>(p<0.01) | Not<br>reported                                                          | Yes                                                                                                              | Strong negative correlation<br>with CDAI<br>R -0.6226<br>p <0.001 | Medium                              |
| Geerling [16]                                      | 1998 | 32              | P   | X                                       | X              | No separate<br>remission<br>group<br><br>(CCh):<br>Median CDAI<br>139,<br>53% remission<br>(CDAI <150)                                                                                              | 50%<br>(<10µmol/L):<br><br>Mean +/-SD<br>CD: 12.0 +/-1.67<br>µmol/l<br>Vs<br>HC: 13.4+/-2.22<br>(P<0.01)                                                                                                                      | Yes                                                                      | Yes                                                                                                              | Intake not among<br>micronutrients assessed                       | Medium                              |

| <b>Zinc</b><br>Author<br>[main text<br>ref number] | Year | N<br>CD<br>(HC) | P/R | Data<br>on %<br>Defici<br>ency<br>in CD | CD<br>vs<br>HC | Separate<br>reporting of<br>remission?<br>method used<br>or<br>% remission in<br>group                                         | Prevalence of<br>Deficiency<br>In CD remission<br>group or if not<br>separately<br>reported in CD<br>group<br>Difference vs HC | Supports<br>Zinc<br>deficiency<br>being<br>present in<br>CD<br>remission | Supports<br>Zinc status<br>being<br>altered in Cd<br>remission in<br>comparison<br>with healthy<br>controls (HC) | Exploration of cause<br>Subgroup analysis or<br>Special tests                                                                                   | Overall<br>Quality (see<br>table 2) |
|----------------------------------------------------|------|-----------------|-----|-----------------------------------------|----------------|--------------------------------------------------------------------------------------------------------------------------------|--------------------------------------------------------------------------------------------------------------------------------|--------------------------------------------------------------------------|------------------------------------------------------------------------------------------------------------------|-------------------------------------------------------------------------------------------------------------------------------------------------|-------------------------------------|
| Geerling<br>[17]                                   | 1999 | 62              | P   |                                         | X              | Yes, mean of<br>50 CD<br>remission<br>reported<br><br>(defined by<br>Van Hees<br><150)                                         | Median (IQR) in<br>CD remission:<br>12.4 (10.8-13.5)<br>μmol/l<br>Vs<br>HC: 13.1 (12.2-<br>13.9) μmol/l<br>P 0.007             | Not<br>reported                                                          | Yes                                                                                                              | Intake of assessed with FFQ<br>but only comparison between<br>CD active and CD remission<br><i>NS</i><br><br>Serum Zinc in CDa vs CDr <i>NS</i> | Medium                              |
| Geerling<br>[18]                                   | 2000 | 23              | P   |                                         | X              | Remission not<br>reported<br>separately<br>(CCh):<br>87% in<br>remission<br>(CDAI <150)<br>Mean (+/-SD)<br>CDAI<br>96.9+/-66.5 | Mean +/- SD in<br>CD: 12.3+/-3.0<br>μmol/L<br>Vs<br>HC:<br>12.9+/-1.3μmol/<br>L<br><i>NS</i>                                   | Not<br>reported                                                          | No                                                                                                               | Intake not among<br>micronutrients assessed                                                                                                     | Medium                              |



| <b>Zinc</b><br>Author<br>[main text<br>ref number] | Year | N<br>CD<br>(HC) | P/R | Data<br>on %<br>Defici<br>ency<br>in CD | CD<br>vs<br>HC | Separate<br>reporting of<br>remission?<br>method used<br>or<br>% remission in<br>group                                                                                  | Prevalence of<br>Deficiency<br>In CD remission<br>group or if not<br>separately<br>reported in CD<br>group<br>Difference vs HC                                                   | Supports<br>Zinc<br>deficiency<br>being<br>present in<br>CD<br>remission | Supports<br>Zinc status<br>being<br>altered in Cd<br>remission in<br>comparison<br>with healthy<br>controls (HC) | Exploration of cause<br>Subgroup analysis or<br>Special tests                                                                                                                                                                                                                    | Overall<br>Quality (see<br>table 2) |
|----------------------------------------------------|------|-----------------|-----|-----------------------------------------|----------------|-------------------------------------------------------------------------------------------------------------------------------------------------------------------------|----------------------------------------------------------------------------------------------------------------------------------------------------------------------------------|--------------------------------------------------------------------------|------------------------------------------------------------------------------------------------------------------|----------------------------------------------------------------------------------------------------------------------------------------------------------------------------------------------------------------------------------------------------------------------------------|-------------------------------------|
| Fillipi [19]                                       | 2006 | 54              | P   | X                                       | X              | All in<br>remission<br>(CDAI <150)<br>All in<br>remission<br><br>CDAI<br>All subjects<br>needed<br>3/12 (CDAI<br><150)<br><br>Mean CRP<br>6.6-/-0.8mg/dl<br>(~63nmol/L) | 65%<br>(no reference<br>ranges)<br>Estimated from<br>graph only<br><br>Biochemical<br>analysis of HC<br>not reported<br>(either as<br>prevalence of<br>deficiency or<br>results) | Yes                                                                      | Not clear /<br>reported                                                                                          | Mean Zn intake assessed with<br>3-day food diary in CD and<br>compared vs HC in male and<br>female separately<br><br>Intake in CD f (n=28) > HC f<br>(n=16) 2.42+/-0.37mg vs<br>0.85+/-0.31mg<br>P <0.01<br>CD m (n=26) vs HC m (n=9)<br>NS                                      | Low                                 |
| Vagianos<br>[34]                                   | 2007 | 84              |     | X                                       |                | No separate<br>remission CD<br>group<br><br>CCh:<br>61% in<br>remission<br>(HBI<5)                                                                                      | 20.5%<br>(<10µmol/L)                                                                                                                                                             | Yes                                                                      | Not clear /<br>reported                                                                                          | Intake assessed with FFQ then<br>4-day food diary inc<br>supplements then compared<br>vs adequacy (defined as <66%<br>dietary reference value (DRV))<br>Zinc intake inadequate in<br>8.5% CD<br><br>Spearman Correlation of Zinc<br>Intake / 100kcal vs serum No<br>relationship | Medium                              |

| <b>Zinc</b><br>Author<br>[main text<br>ref number] | Year | N<br>CD<br>(HC) | P/R | Data<br>on %<br>Defici<br>ency<br>in CD | CD<br>vs<br>HC | Separate<br>reporting of<br>remission?<br>method used<br>or<br>% remission in<br>group                                                                                                               | Prevalence of<br>Deficiency<br>In CD remission<br>group or if not<br>separately<br>reported in CD<br>group<br>Difference vs HC | Supports<br>Zinc<br>deficiency<br>being<br>present in<br>CD<br>remission | Supports<br>Zinc status<br>being<br>altered in Cd<br>remission in<br>comparison<br>with healthy<br>controls (HC) | Exploration of cause<br>Subgroup analysis or<br>Special tests                        | Overall<br>Quality (see<br>table 2) |
|----------------------------------------------------|------|-----------------|-----|-----------------------------------------|----------------|------------------------------------------------------------------------------------------------------------------------------------------------------------------------------------------------------|--------------------------------------------------------------------------------------------------------------------------------|--------------------------------------------------------------------------|------------------------------------------------------------------------------------------------------------------|--------------------------------------------------------------------------------------|-------------------------------------|
| Valentini<br>[35]                                  | 2008 | 94              | P   | X                                       | X              | All in<br>remission<br>(CDAI <150)                                                                                                                                                                   | 4.3%<br>(<10.3µmol/L)<br><br>Conc vs sex<br>matched HC NS                                                                      | Yes                                                                      | No                                                                                                               | nil                                                                                  | Medium                              |
| De Castro<br>[53]                                  | 2019 | 31              | P   | X                                       |                | Remission<br>defined with<br>endoscopy<br>(<5, no deep<br>ulcers or) or<br>MRI with none<br>or creeping<br>fat, deep<br>ulcers or<br>oedema.<br>Mean (SD)<br>CDAI of this<br>group<br>41.35(+/-41.2) | 45%<br>(<80mcg/dl)                                                                                                             | Yes                                                                      | Not clear /<br>reported                                                                                          | Mean Zn compared in<br>remission group to those with<br>endoscopy / MRI activity- NS | Medium                              |

| <b>Zinc</b><br>Author<br>[main text<br>ref number] | Year | N<br>CD<br>(HC) | P/R | Data<br>on %<br>Defici<br>ency<br>in CD | CD<br>vs<br>HC | Separate<br>reporting of<br>remission?<br>method used<br>or<br>% remission in<br>group                                                                     | Prevalence of<br>Deficiency<br>In CD remission<br>group or if not<br>separately<br>reported in CD<br>group<br>Difference vs HC | Supports<br>Zinc<br>deficiency<br>being<br>present in<br>CD<br>remission | Supports<br>Zinc status<br>being<br>altered in Cd<br>remission in<br>comparison<br>with healthy<br>controls (HC) | Exploration of cause<br>Subgroup analysis or<br>Special tests                                                                                                                                                                                                                                                                                                                                                                                                                                                                                                                                                     | Overall<br>Quality (see<br>table 2) |
|----------------------------------------------------|------|-----------------|-----|-----------------------------------------|----------------|------------------------------------------------------------------------------------------------------------------------------------------------------------|--------------------------------------------------------------------------------------------------------------------------------|--------------------------------------------------------------------------|------------------------------------------------------------------------------------------------------------------|-------------------------------------------------------------------------------------------------------------------------------------------------------------------------------------------------------------------------------------------------------------------------------------------------------------------------------------------------------------------------------------------------------------------------------------------------------------------------------------------------------------------------------------------------------------------------------------------------------------------|-------------------------------------|
| MacMaster<br>[20]                                  | 2021 | 59              | P   | X                                       |                | All in clinical<br>remission<br>(CDAI<150)<br><br>53% in<br>biochem<br>remission<br>(BCR) (FCP <<br>250, CRP <10<br>Alb >35)<br>(not report<br>separately) | 14%<br><br><11.0µmol/L<br>men<br><10µmol/L<br>women                                                                            | Yes                                                                      | Not<br>reported                                                                                                  | Relationship between Alb, FCP<br>and crp explored with<br>Spearman's RHO. Alb significantly<br>correlated ( $\rho = 0.28$ ; $p = 0.007$ )<br><br>Exploration of phenotypic<br>predictors of deficiency found Zn<br>deficiency to be more common in<br>Young age ( $p=0.031$ ), low<br>albumin ( $p=0.018$ ), low BMI<br>( $p<0.001$ )<br><br>Survival analysis vs flare in<br>subsequent 12 months found Zn<br>deficiency predictive of a shorter<br>time to relapse (HR: 6.9; 95% CI<br>1.9 to 26; $p = 0.001$ )<br>This relationship remained after<br>adjustment for CRP and FCP (HR<br>9.5; 95% CI 2.2 to 42) | Medium                              |
